# Supplementary material
Source: PubMed Central journal article supplement (PMC6097942)

# Synthesis of Azolo[1,3,5]triazines via Rhodium(III)-Catalyzed Annulation of *N*-Azolo Imines and Dioxazolones

Gia L. Hoang, Kim Søholm Halskov and Jonathan A. Ellman\*

*Department of Chemistry, Yale University, New Haven, Connecticut 06520*

[jonathan.ellman@yale.edu](mailto:jonathan.ellman@yale.edu)

## SUPPORTING INFORMATION

### Table of Contents

|                                                                                                                                 |        |
|---------------------------------------------------------------------------------------------------------------------------------|--------|
| Structures of <i>N</i> -azolo imines <b>1</b> and 3-substituted-1,4,2-dioxazol-5-ones <b>4</b> .....                            | S2–S3  |
| <sup>1</sup> H- and <sup>13</sup> C-NMR spectra for new <i>N</i> -azolo imines .....                                            | S4–S6  |
| <sup>1</sup> H- and <sup>13</sup> C-NMR spectra for new dioxazolone <b>4i</b> .....                                             | S7     |
| <sup>1</sup> H-, <sup>13</sup> C-, and <sup>19</sup> F-NMR spectra for <i>N</i> -fused [5,6]-bicyclic heterocycle products..... | S8–S37 |

## Structures of *N*-azolo imines

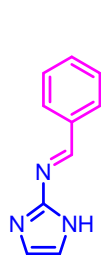

**1a**

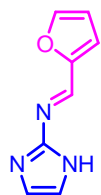

**1b**

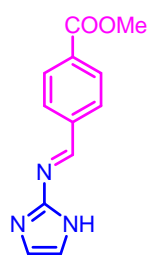

**1c**

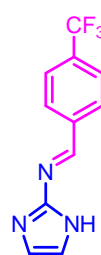

**1d**

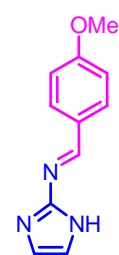

**1e**

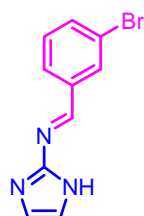

**1f**

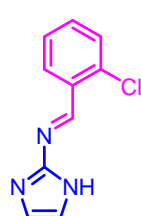

**1g**

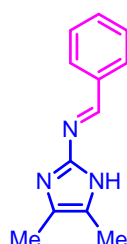

**1h**

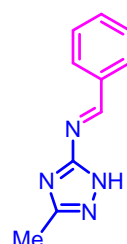

**1i**

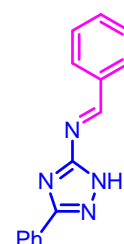

**1j**

### Structures of 3-substituted-1,4,2-dioxazol-5-ones

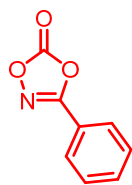

4a

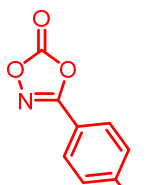

4b

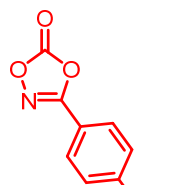

4c

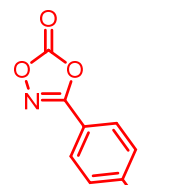

4d

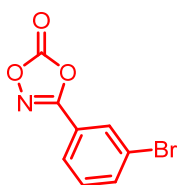

4e

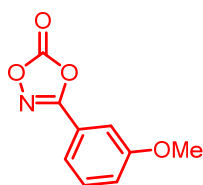

4f

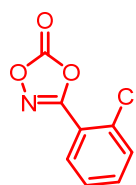

4g

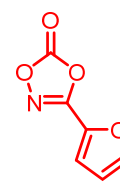

4h

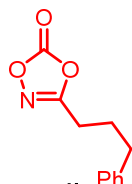

4i

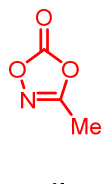

4j

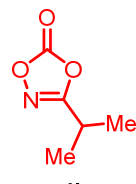

4k

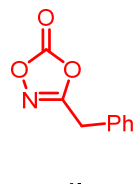

4l

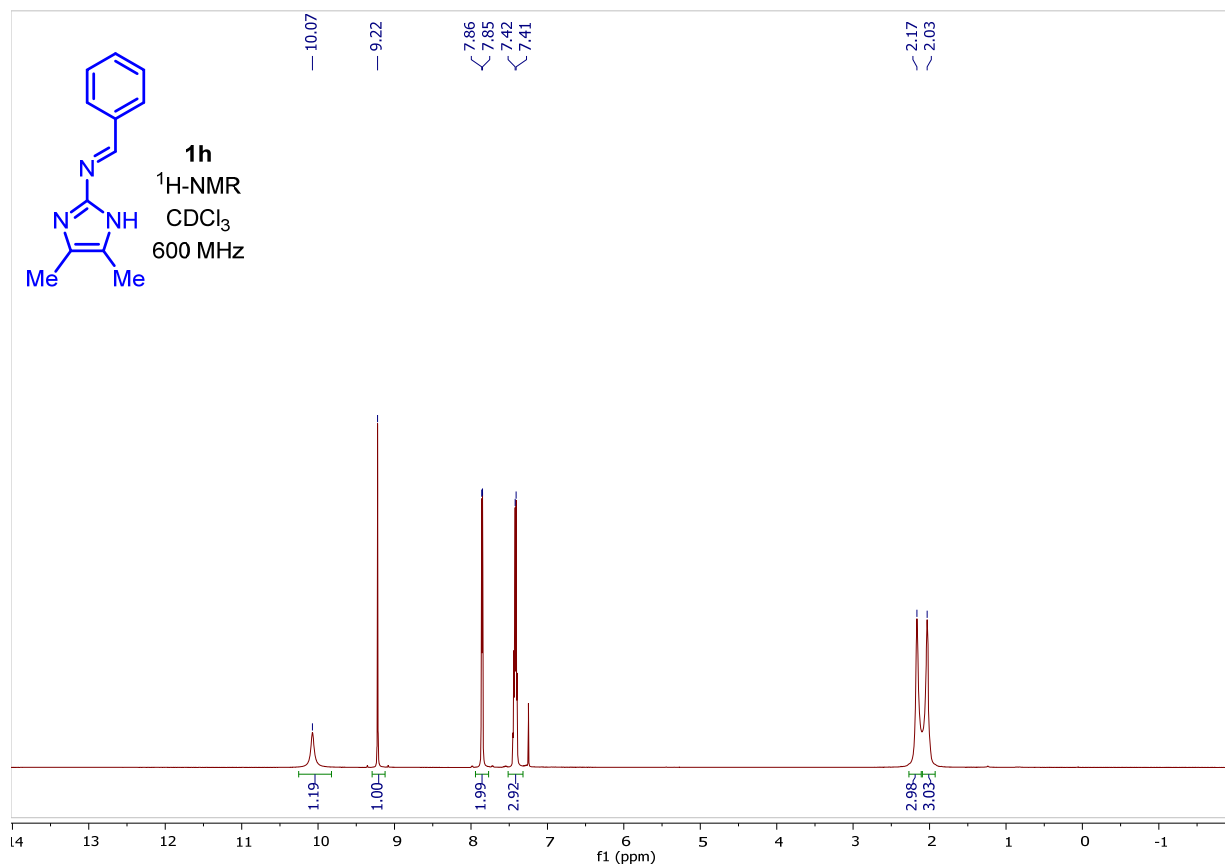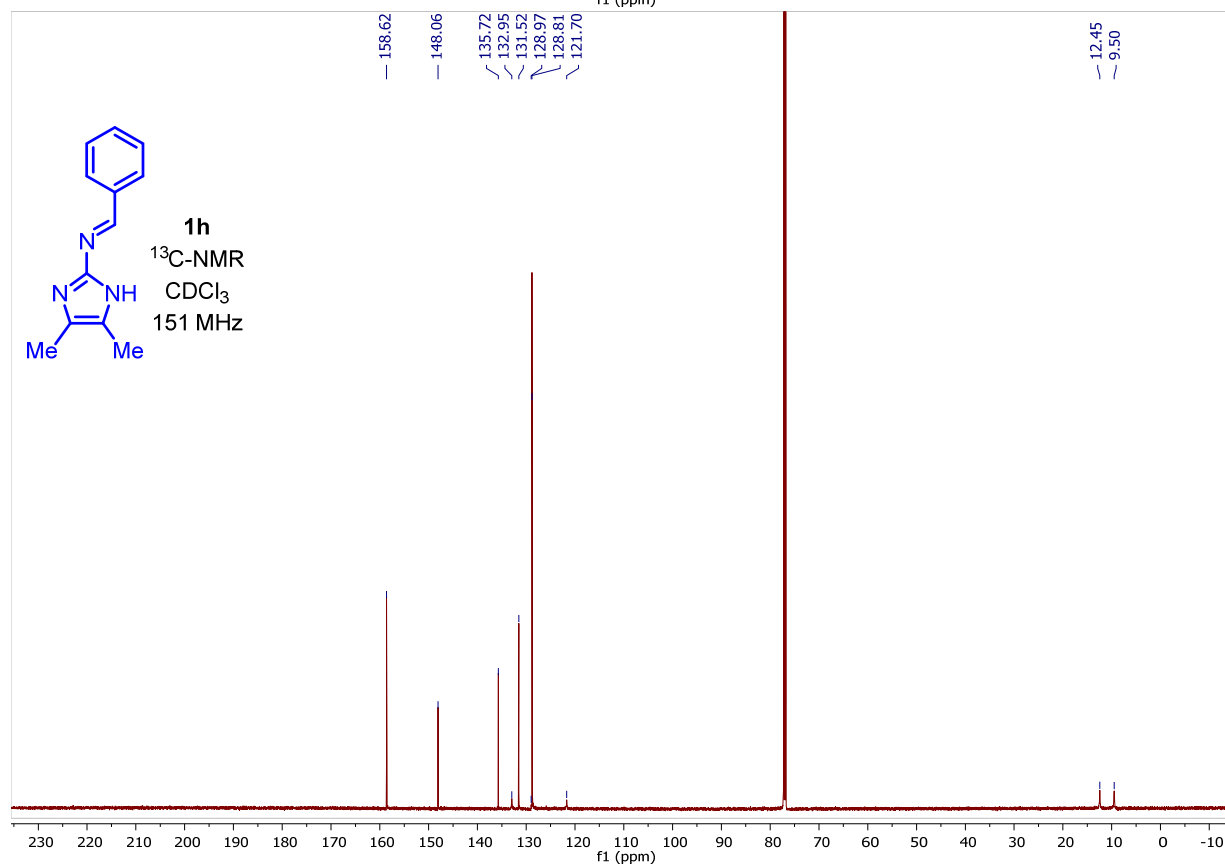

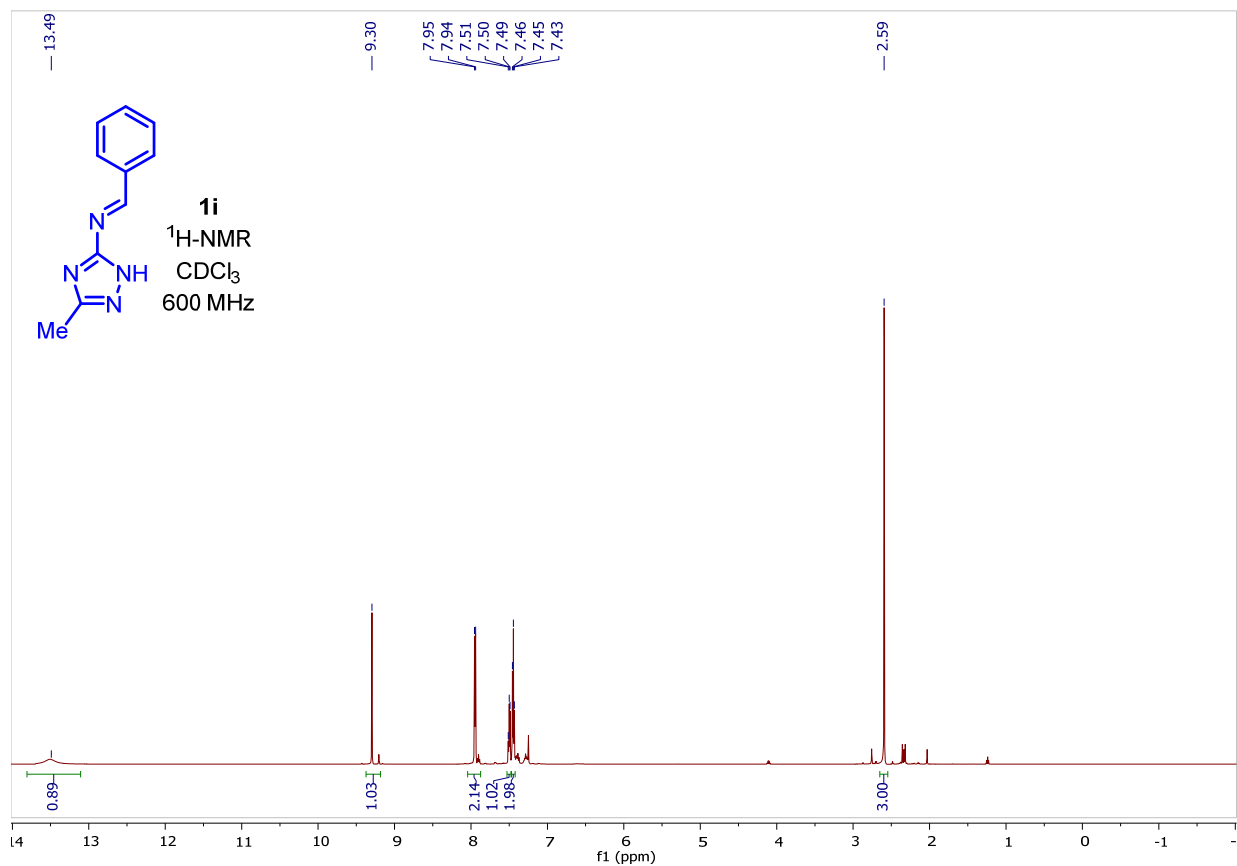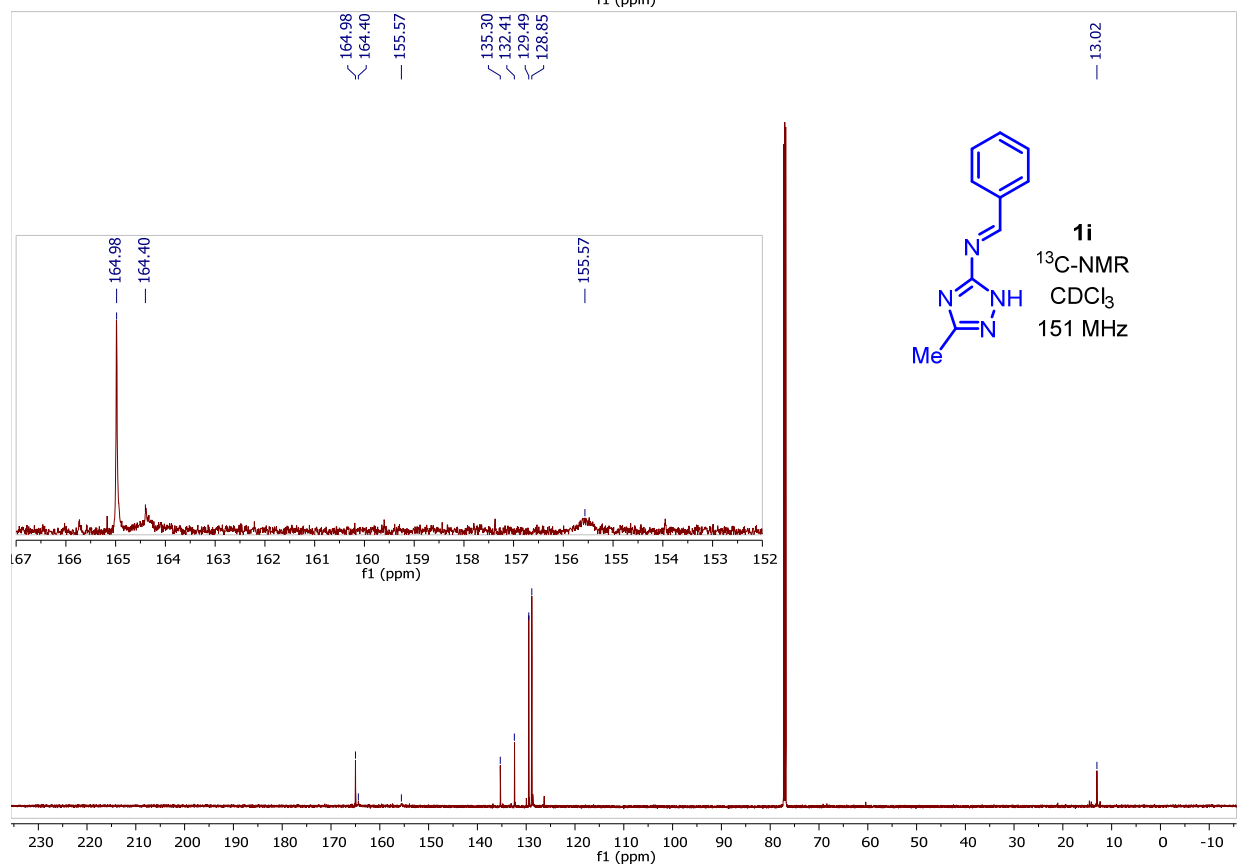

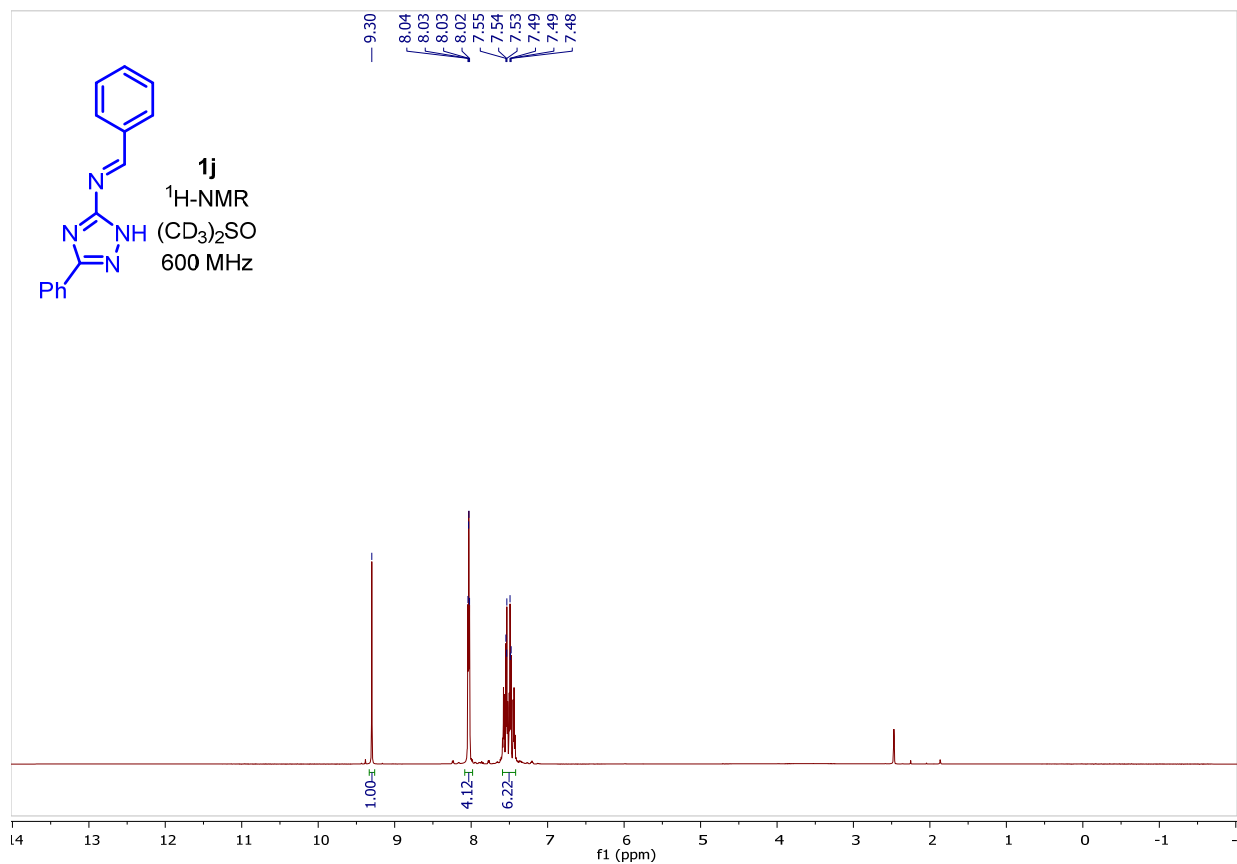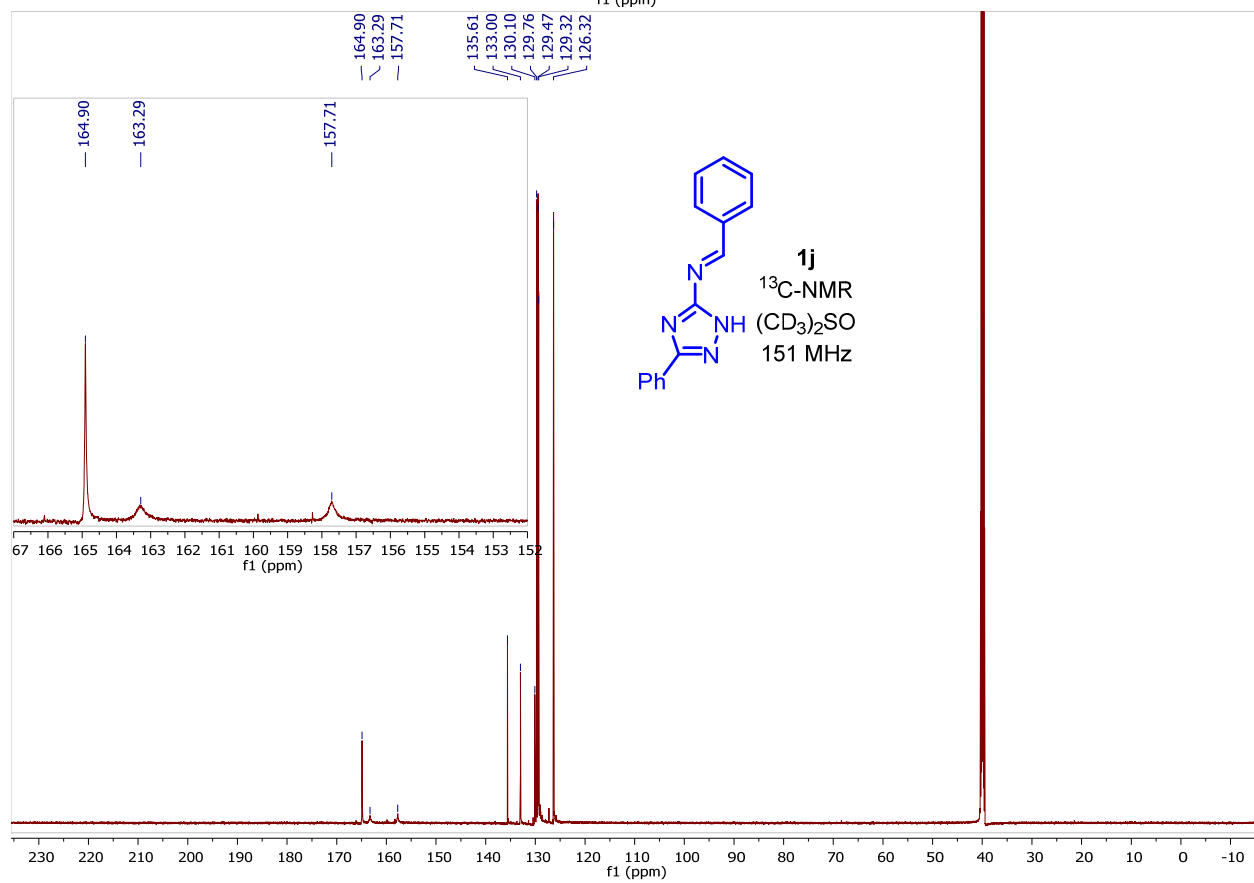

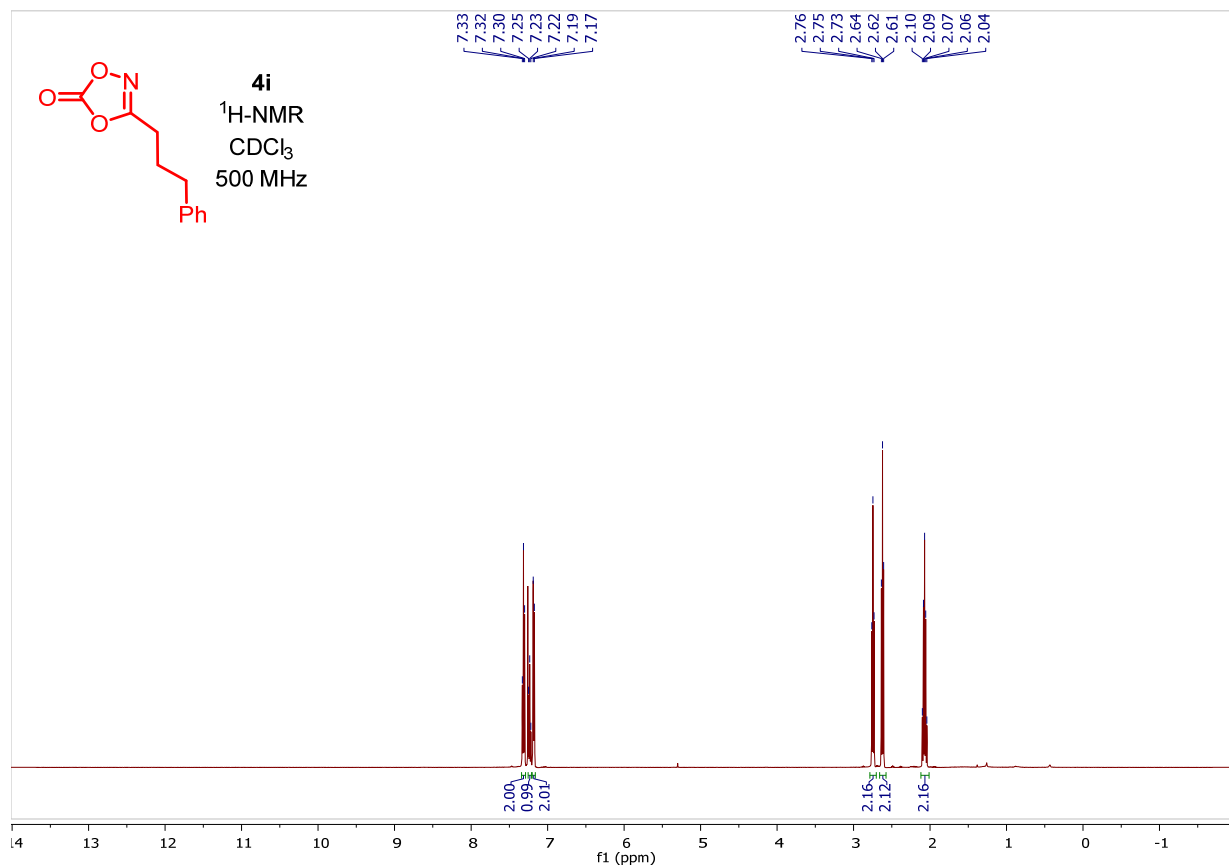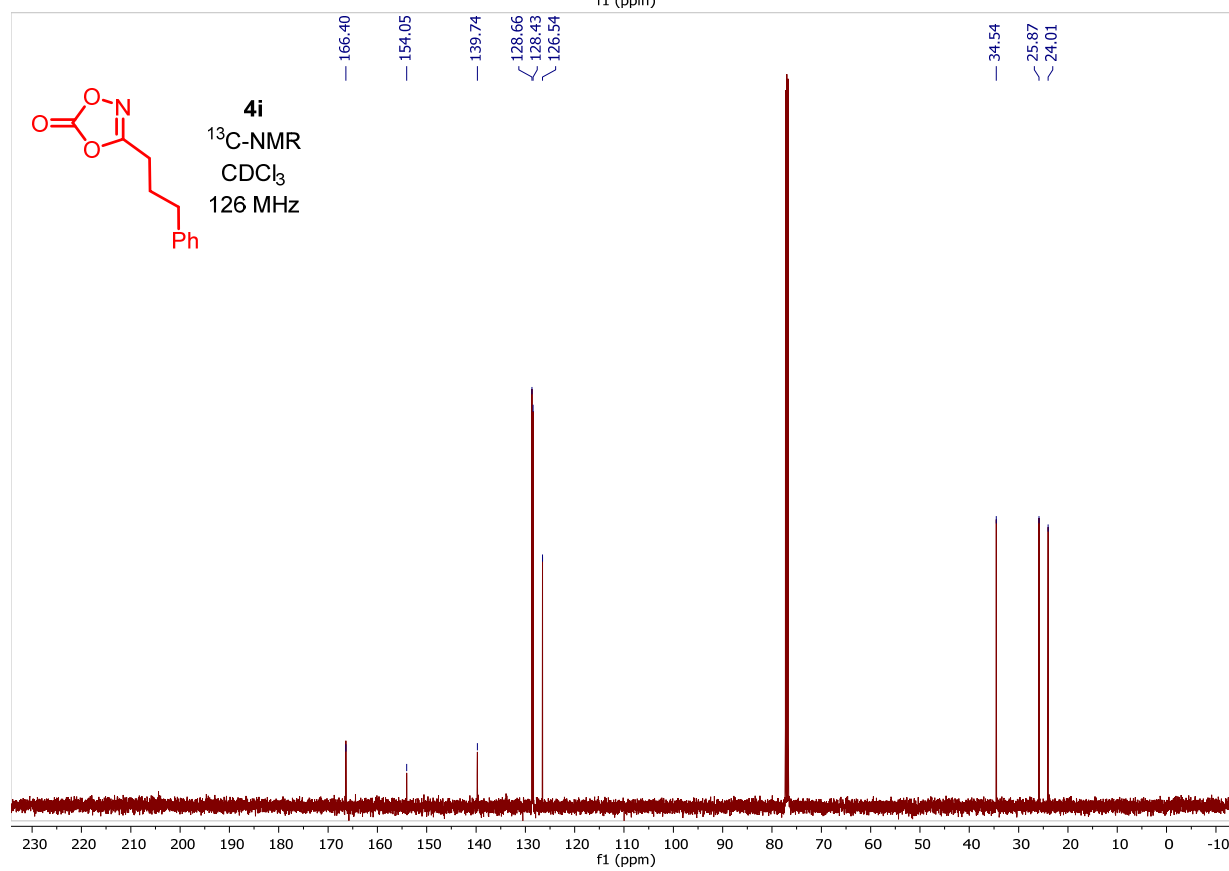

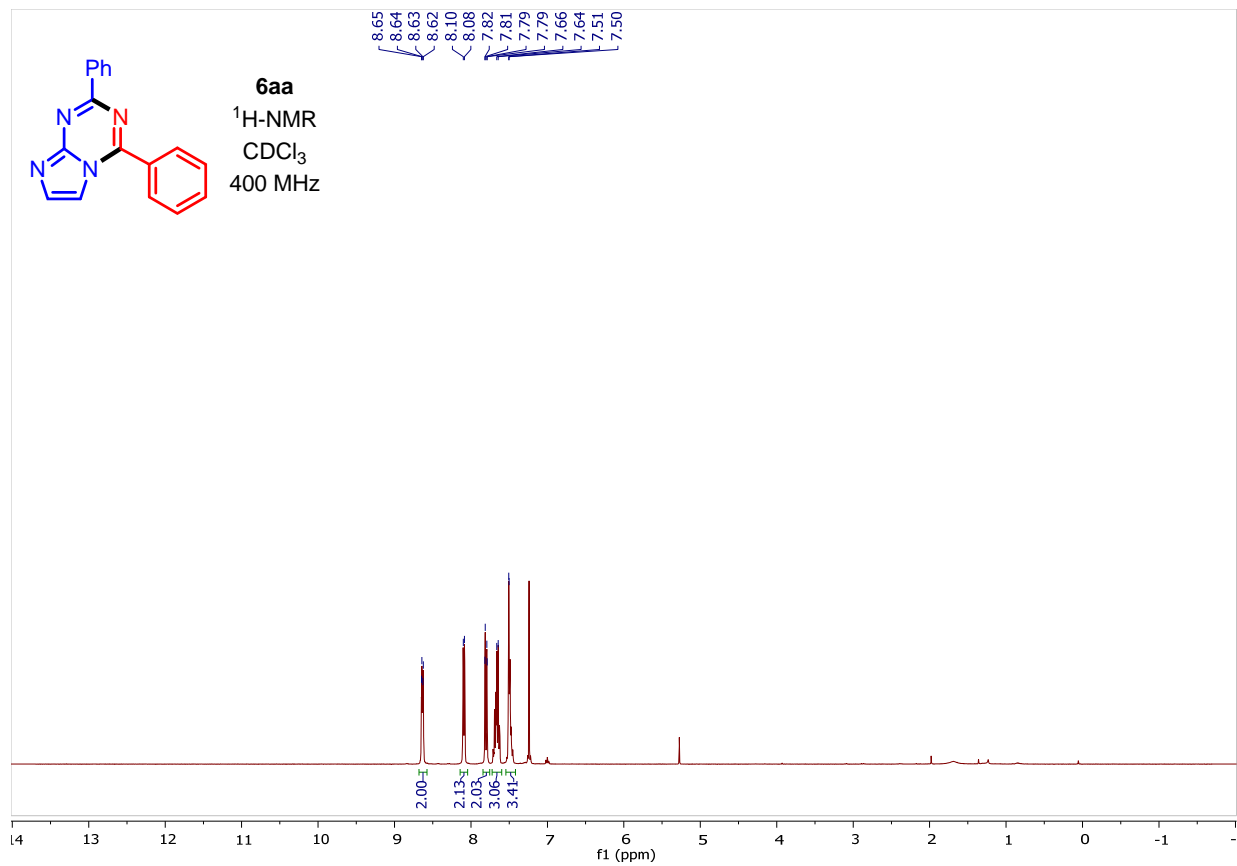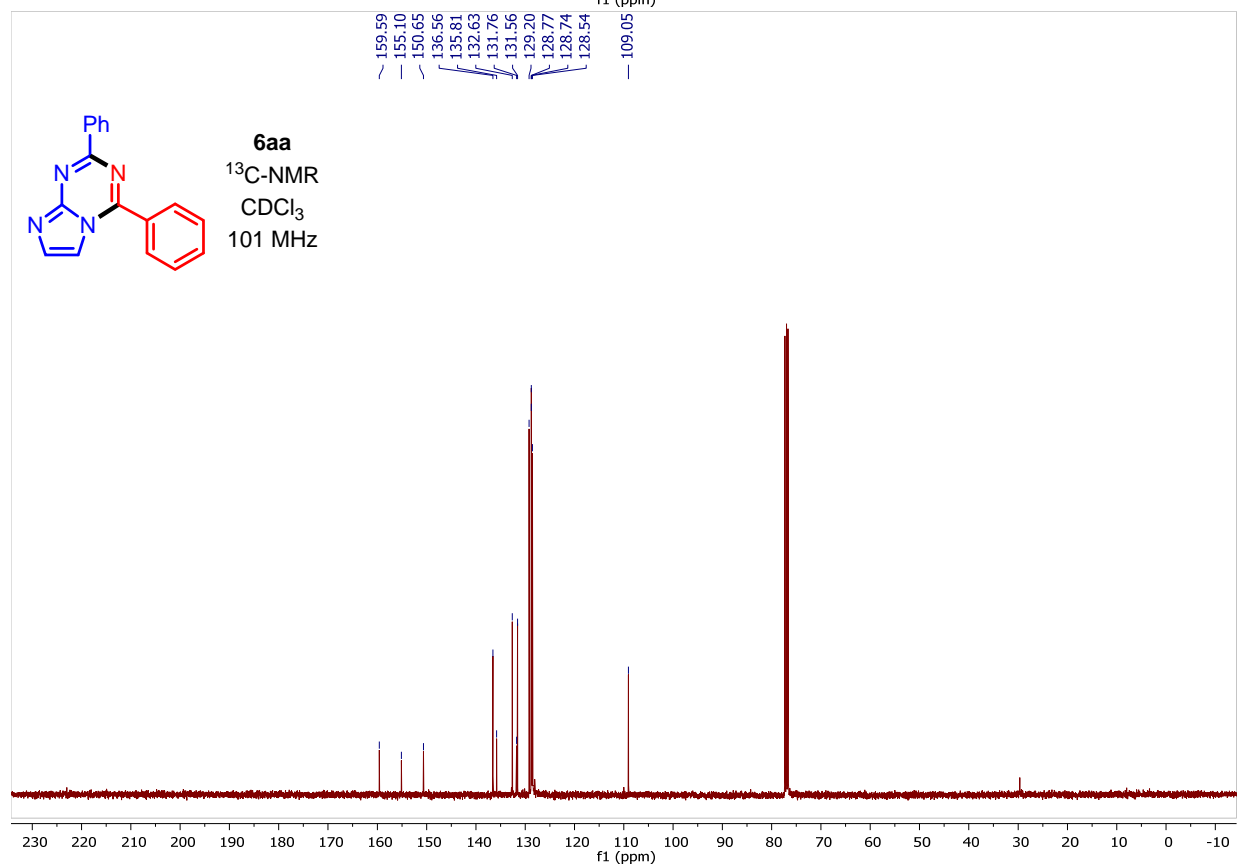



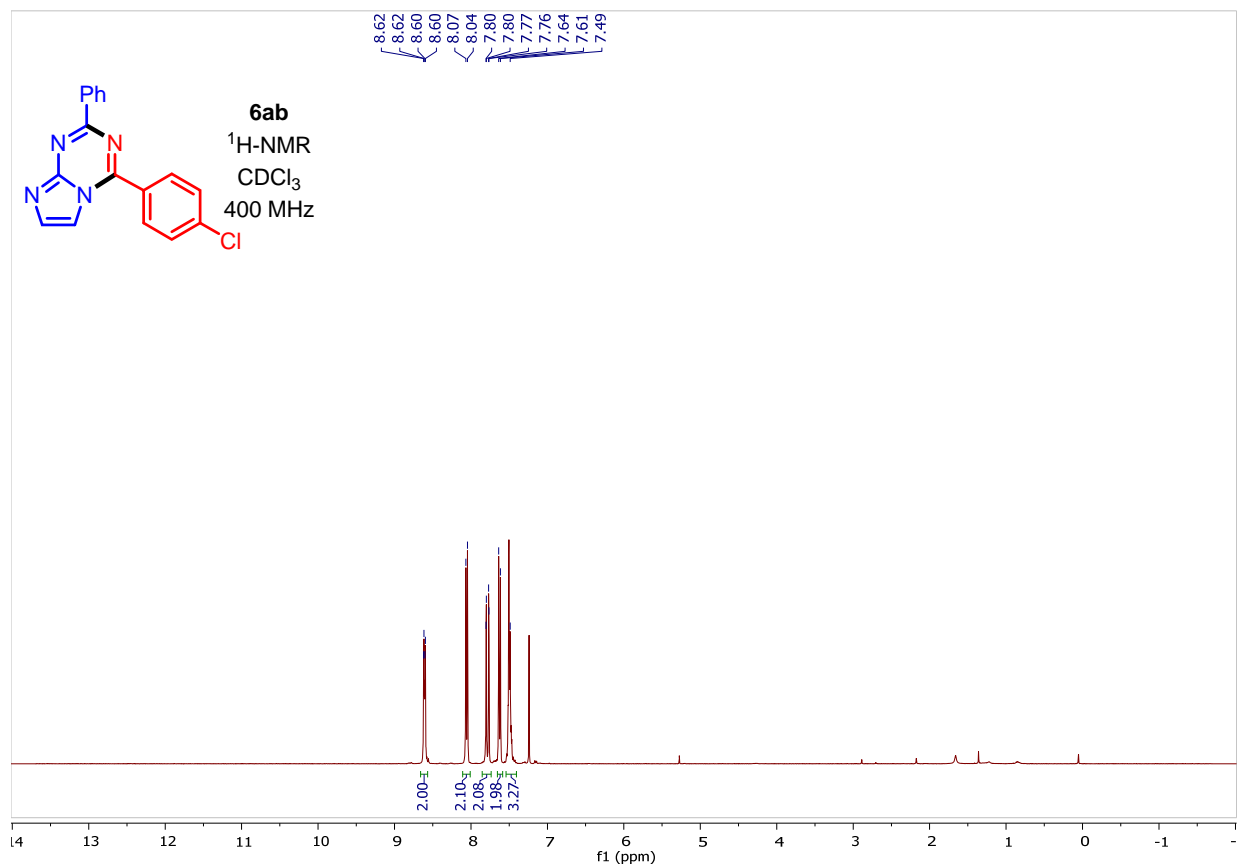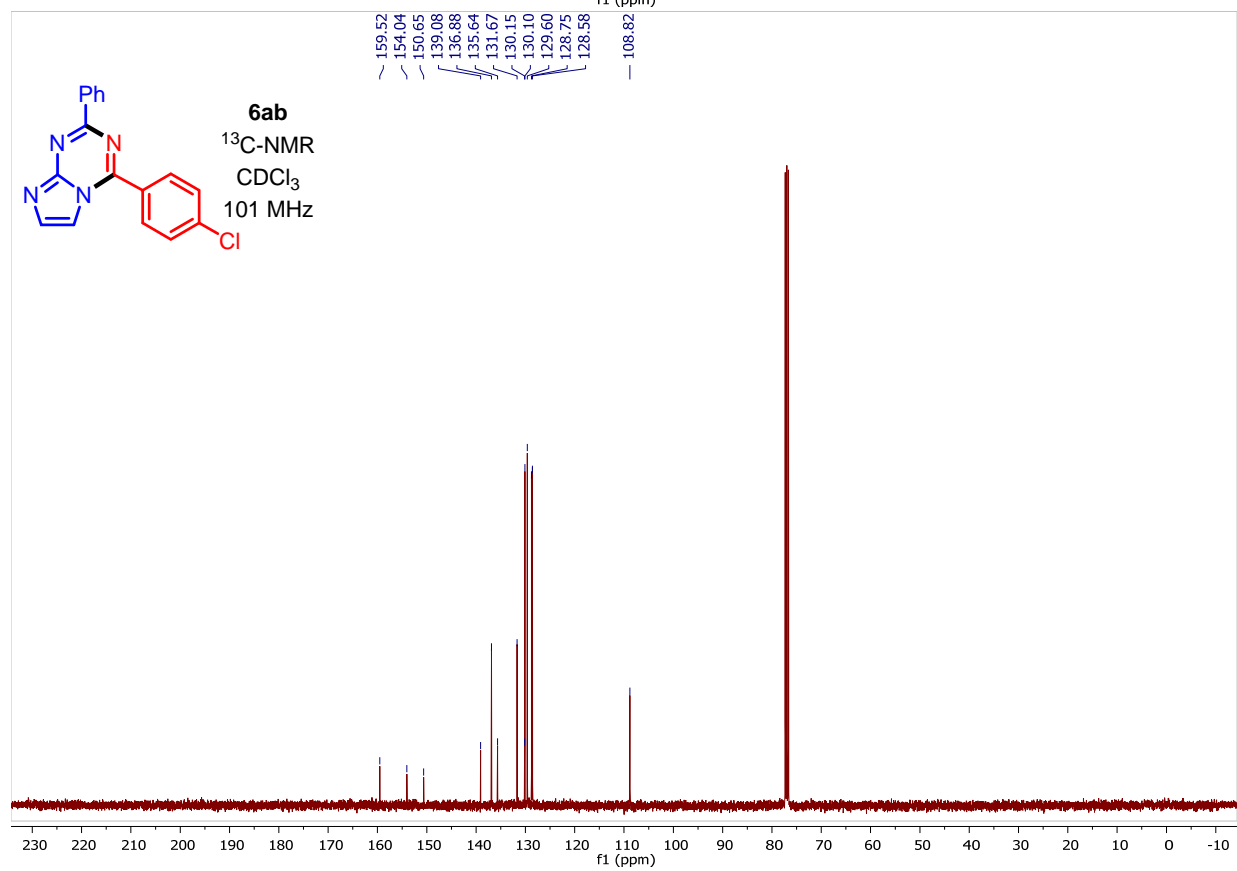

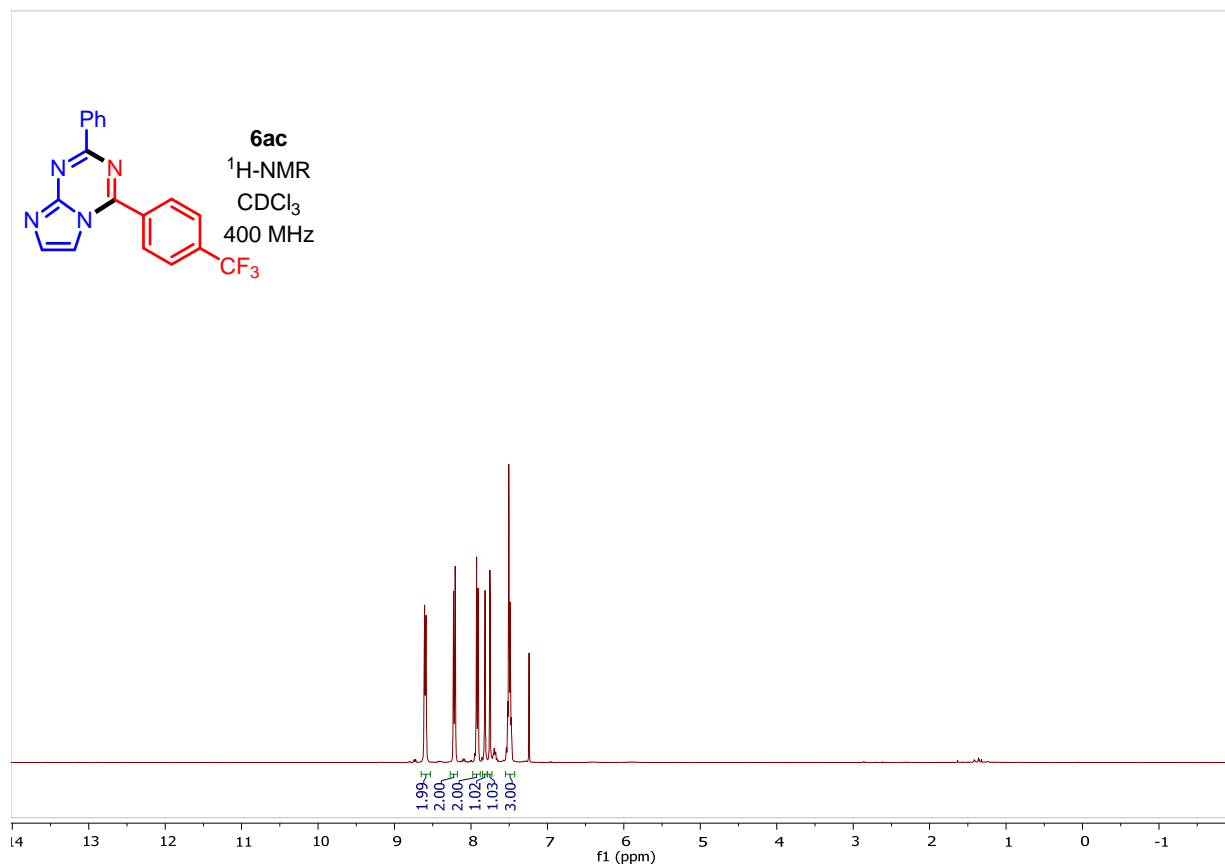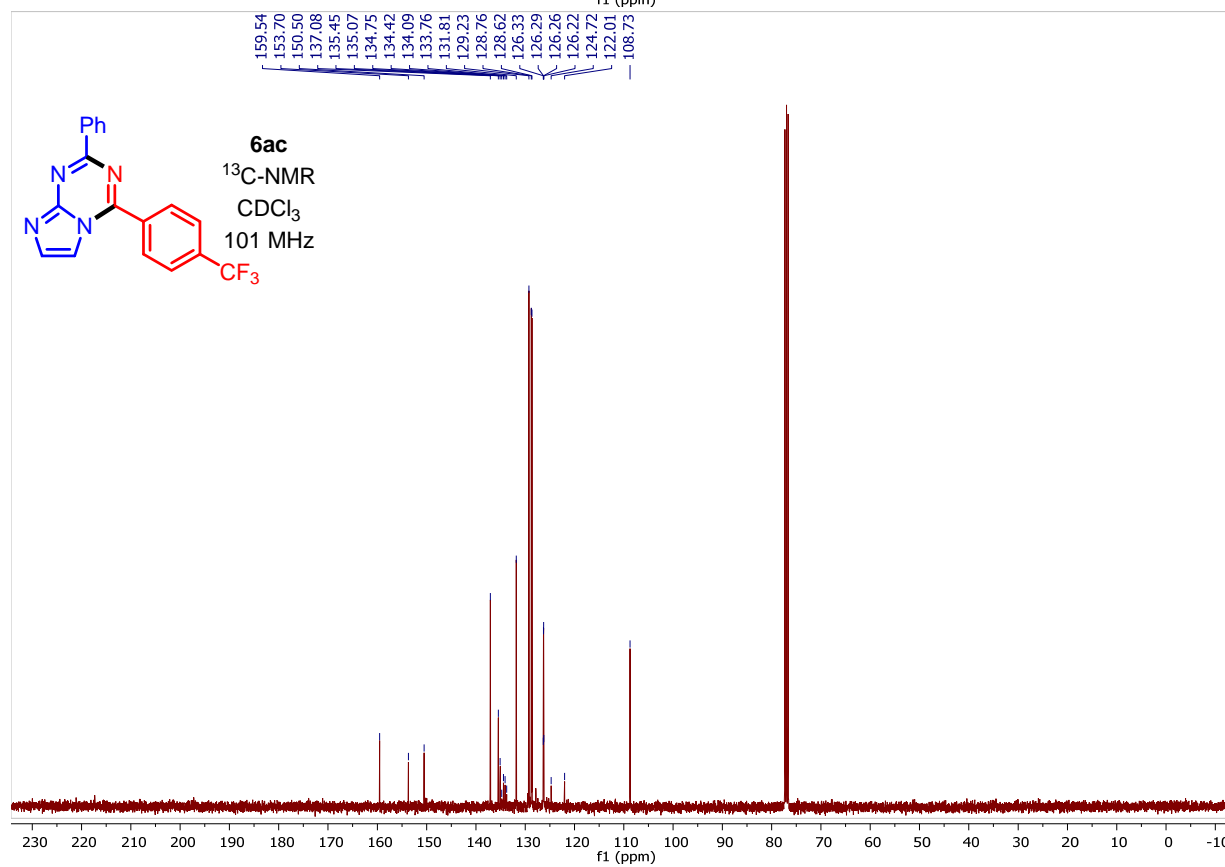

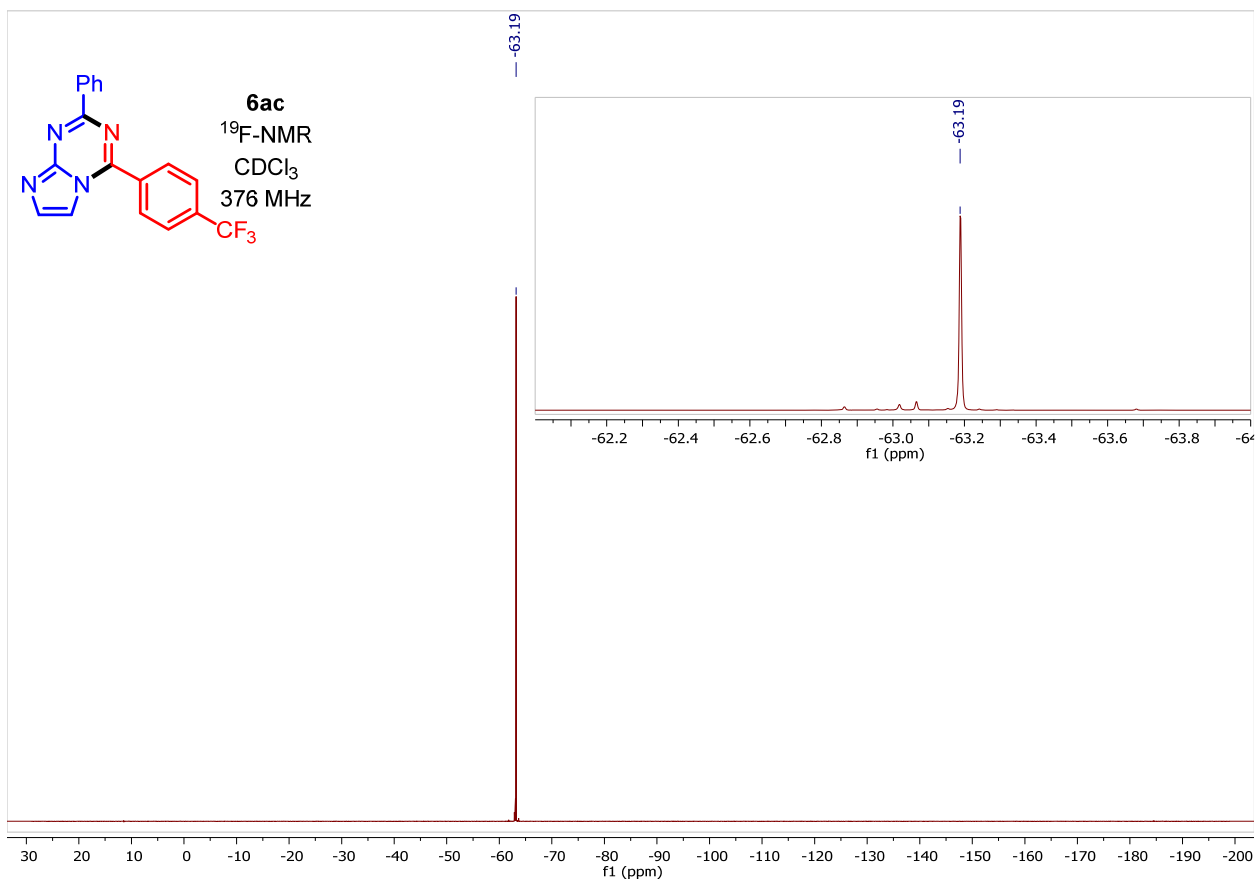

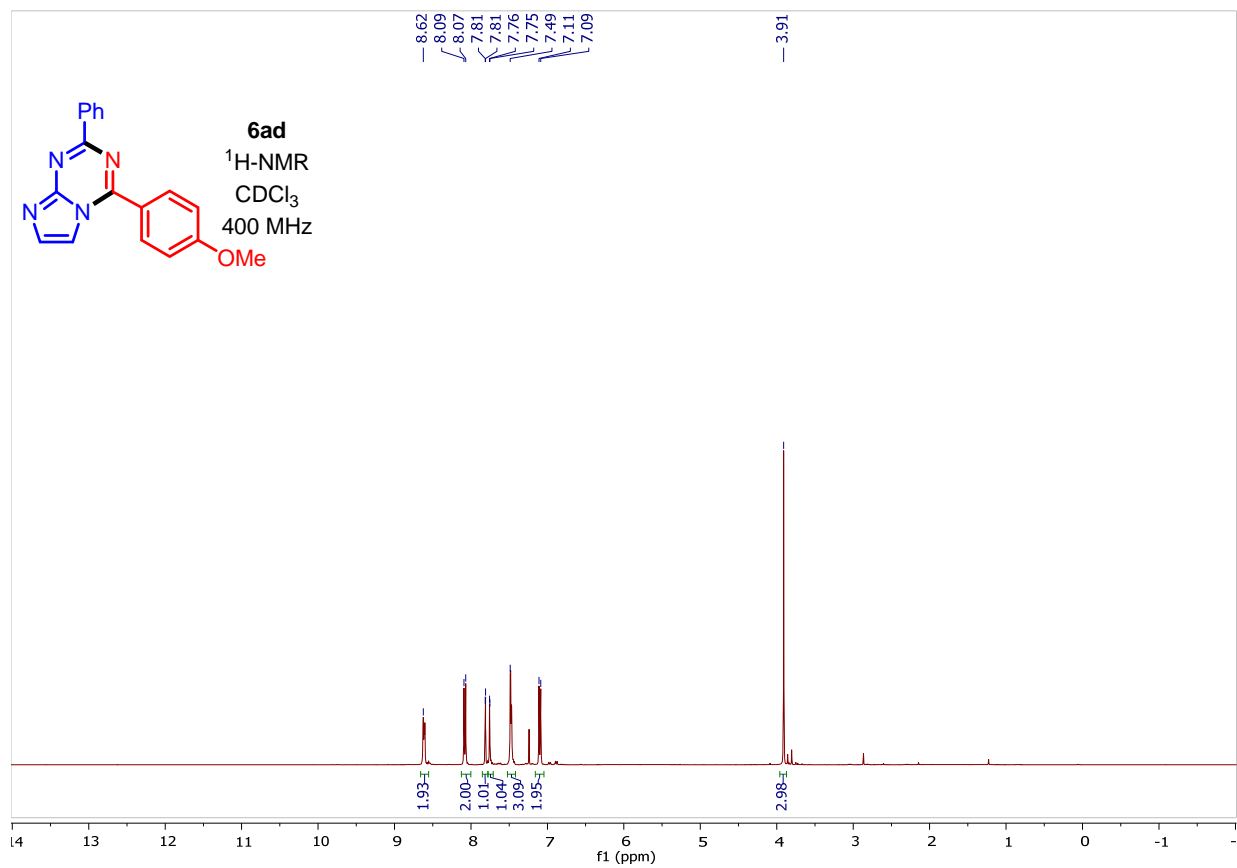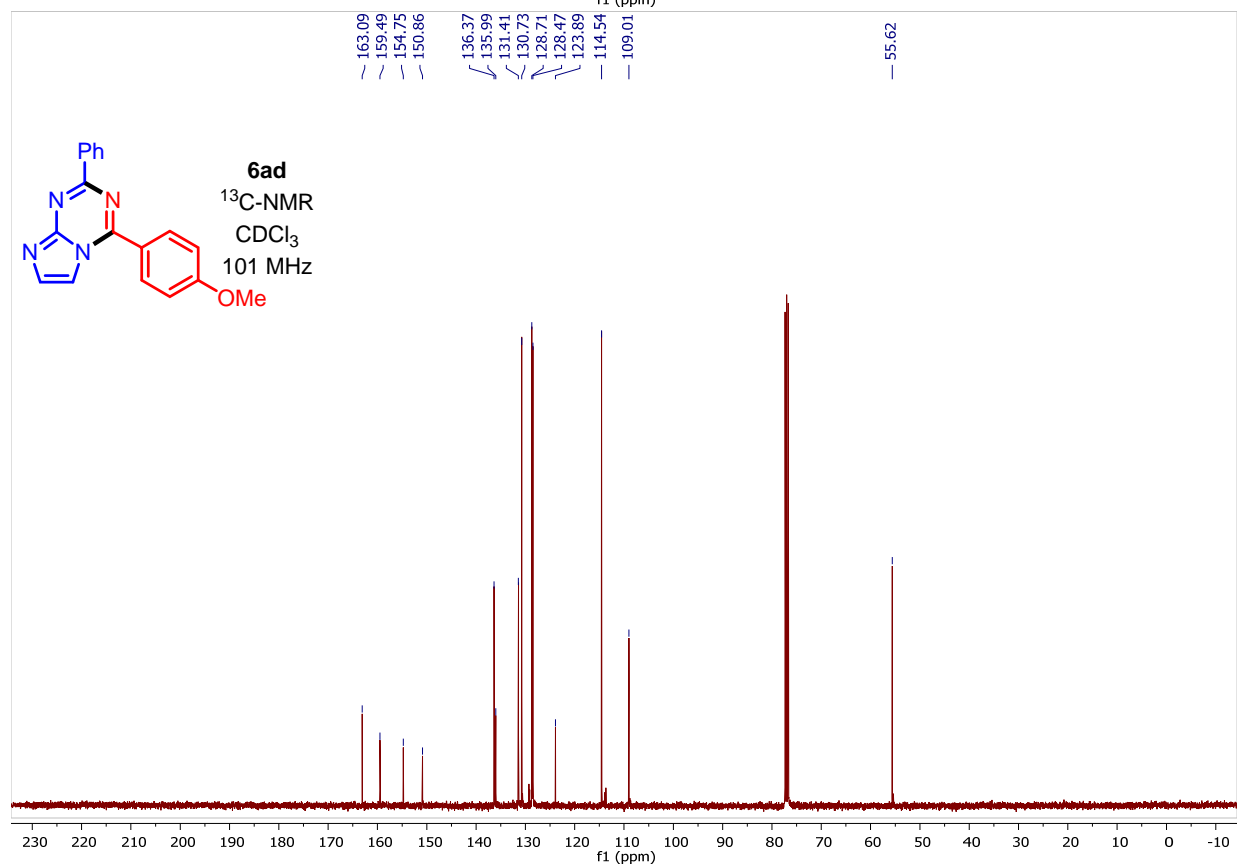

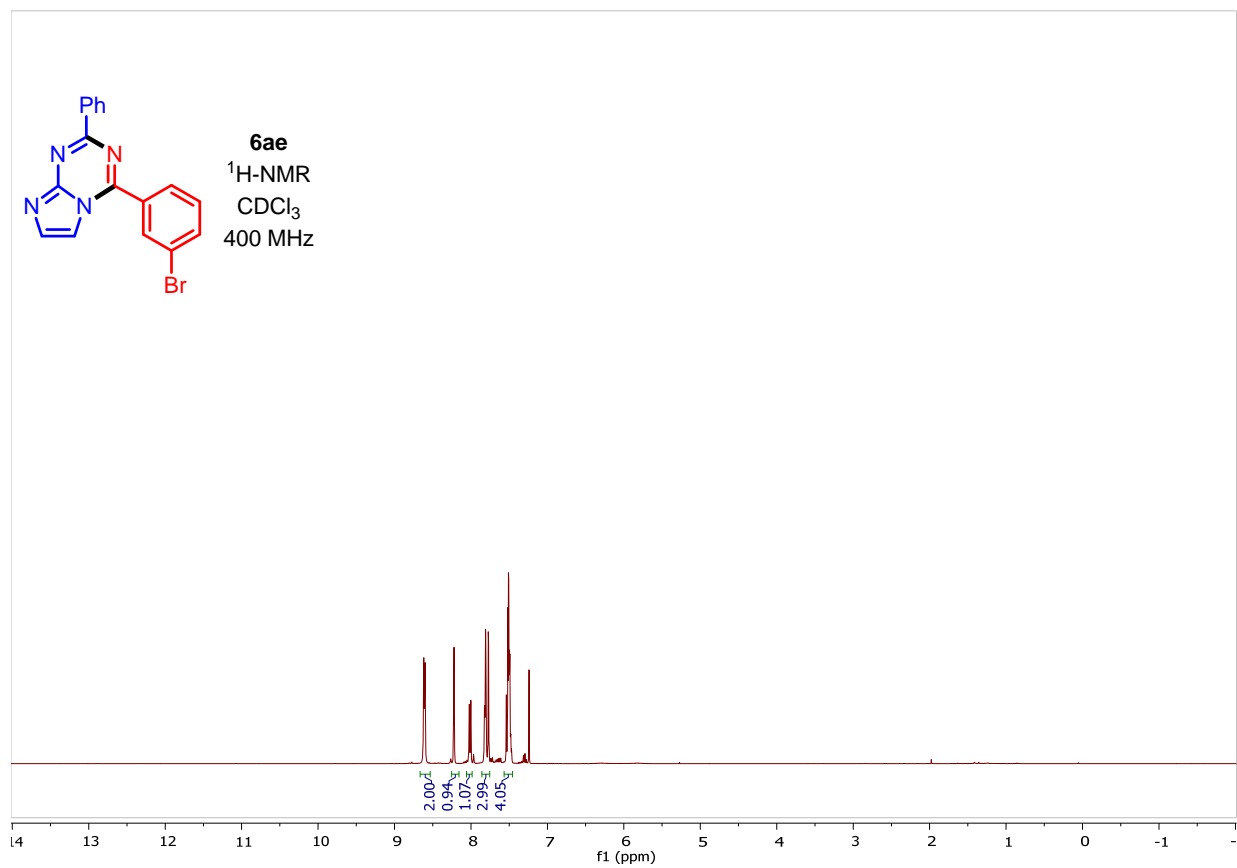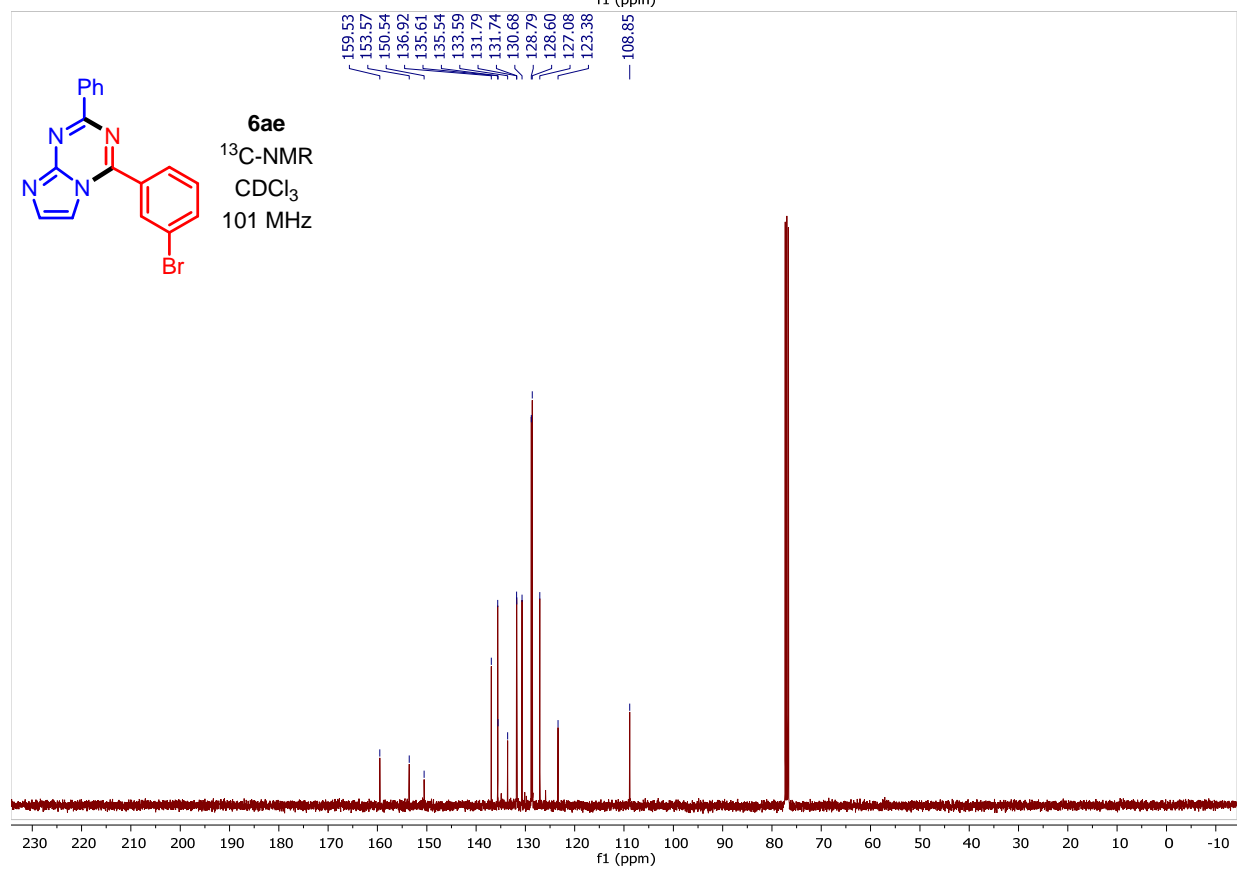

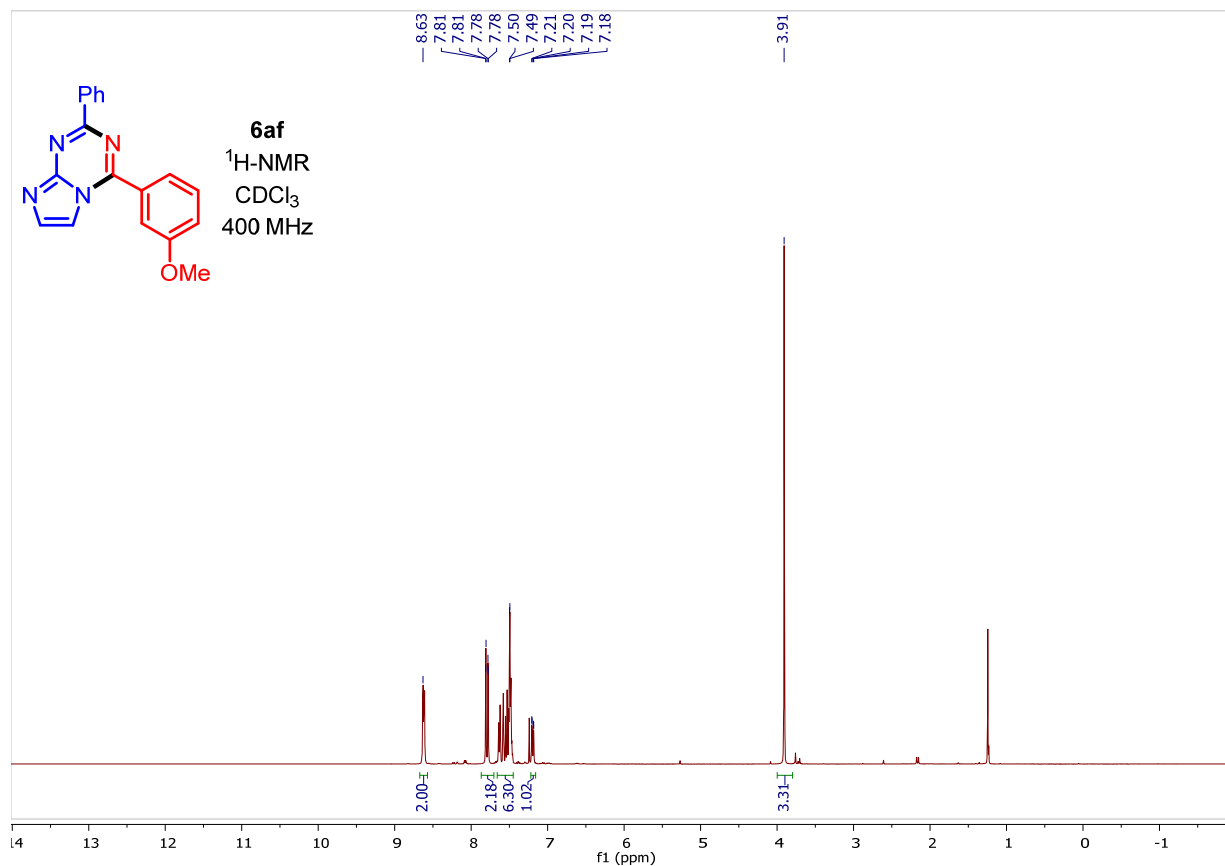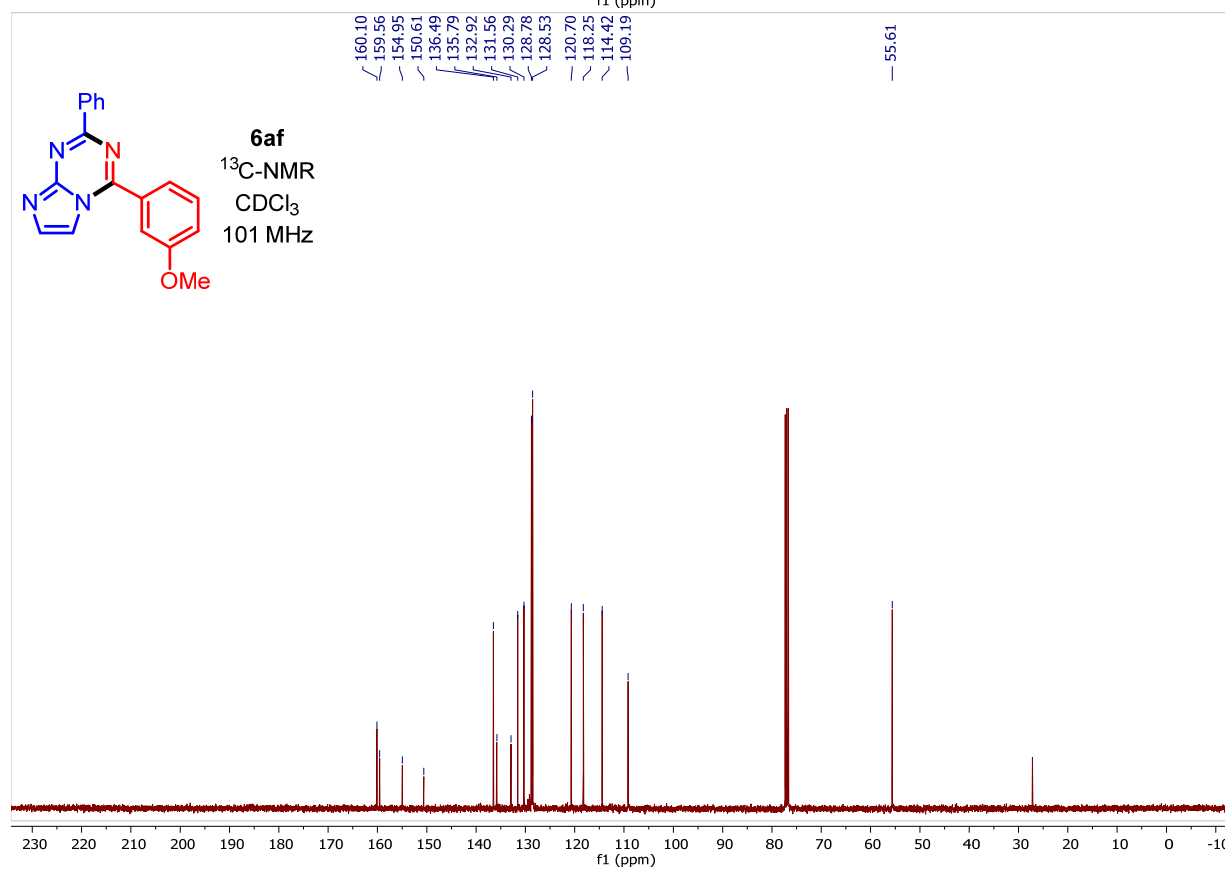

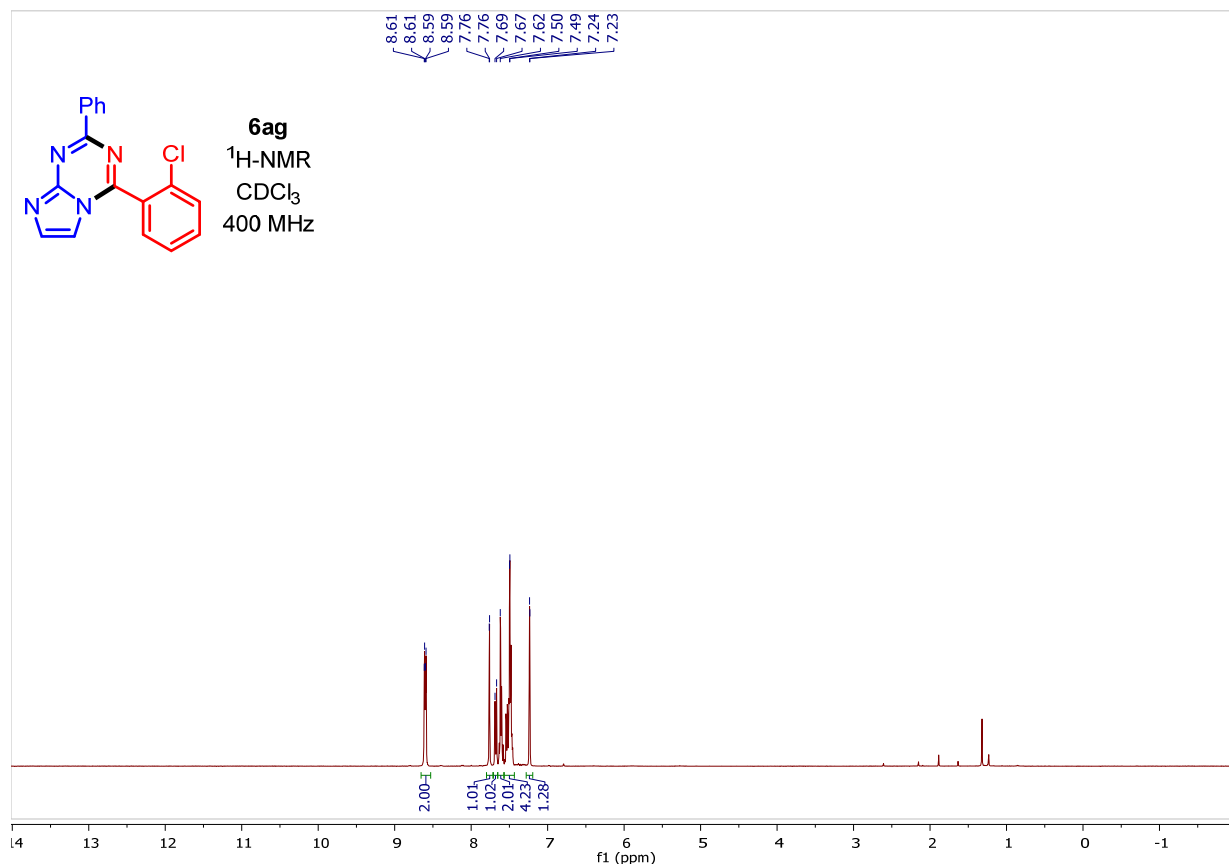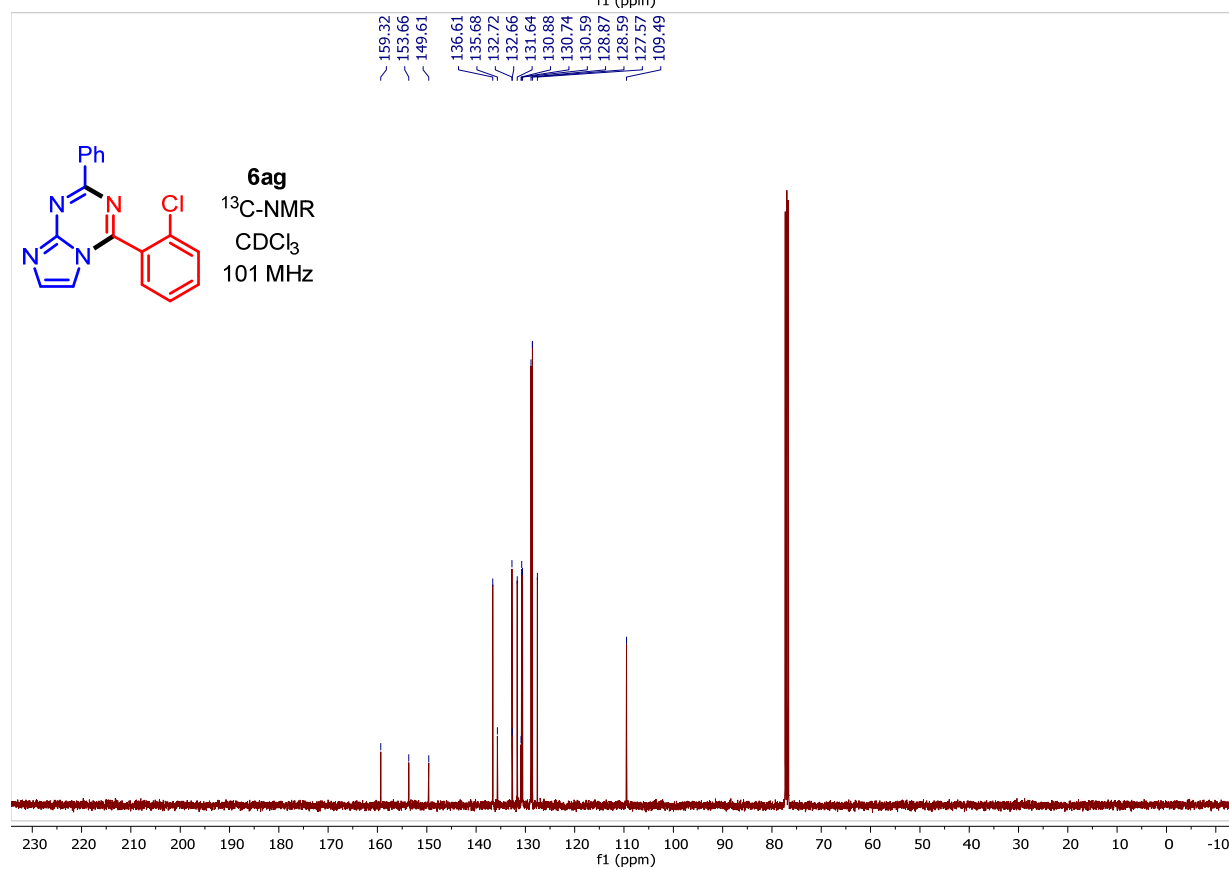

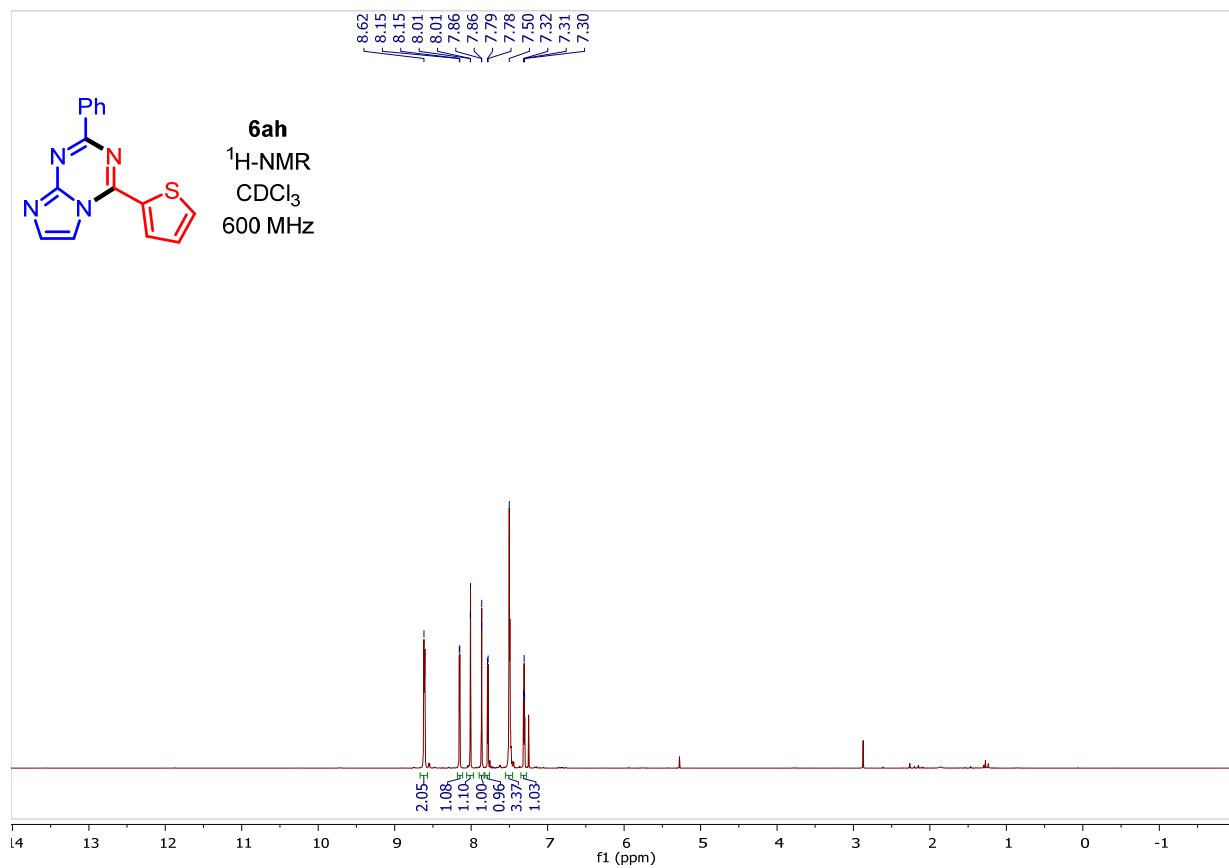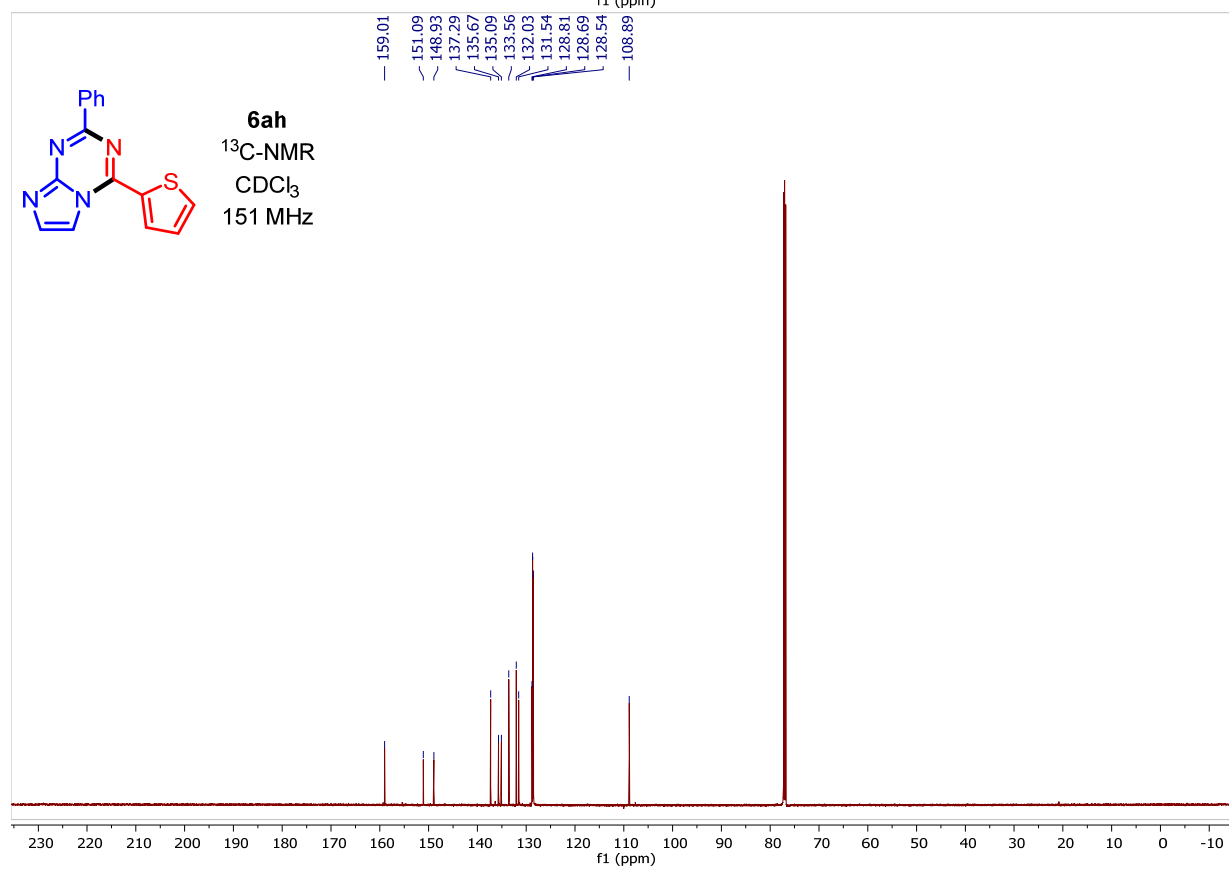



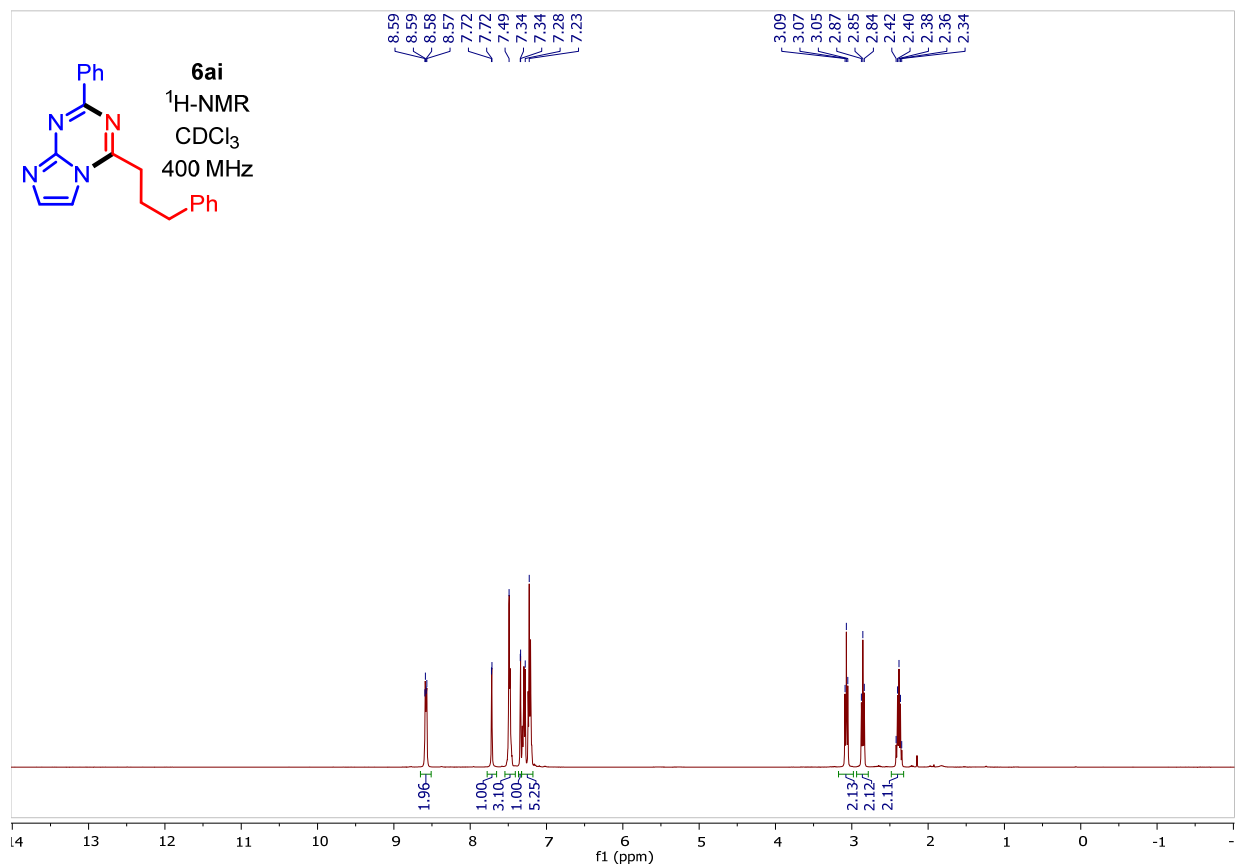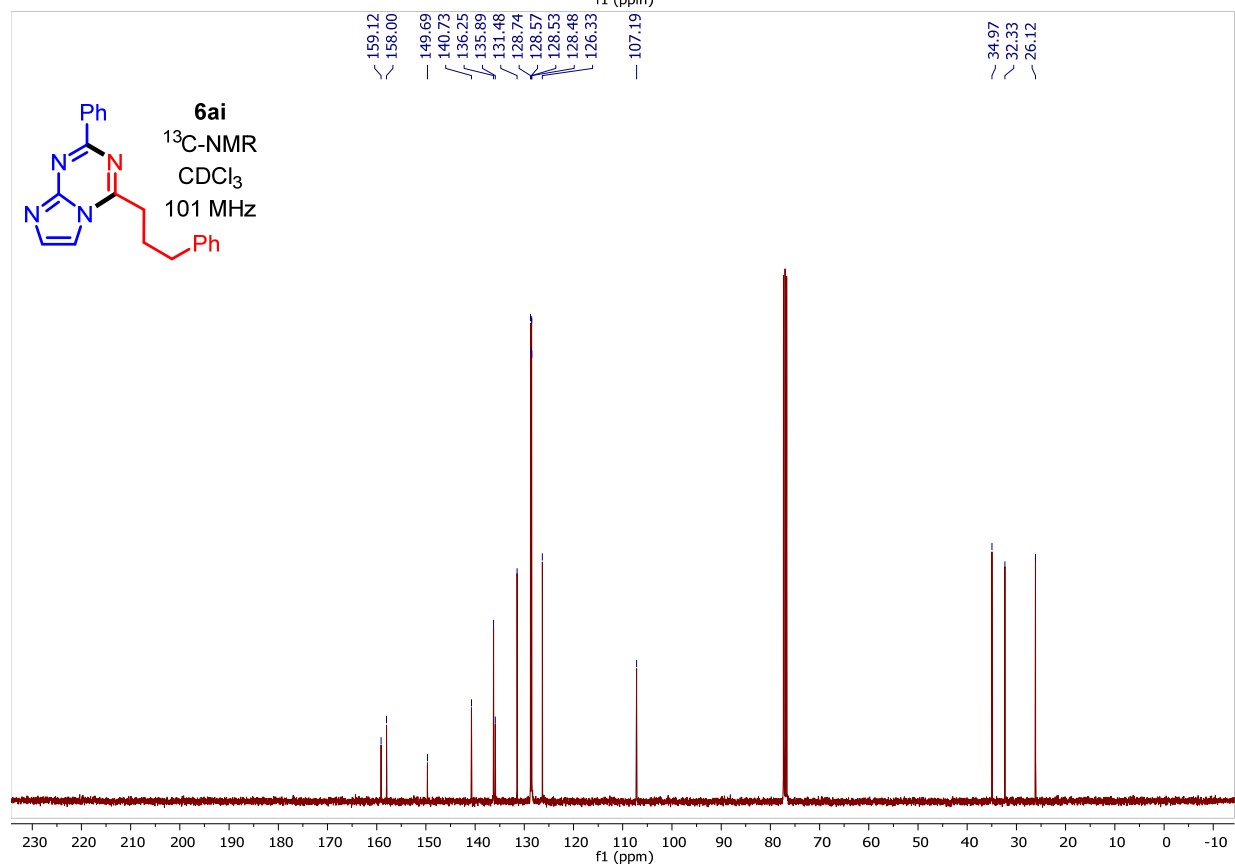

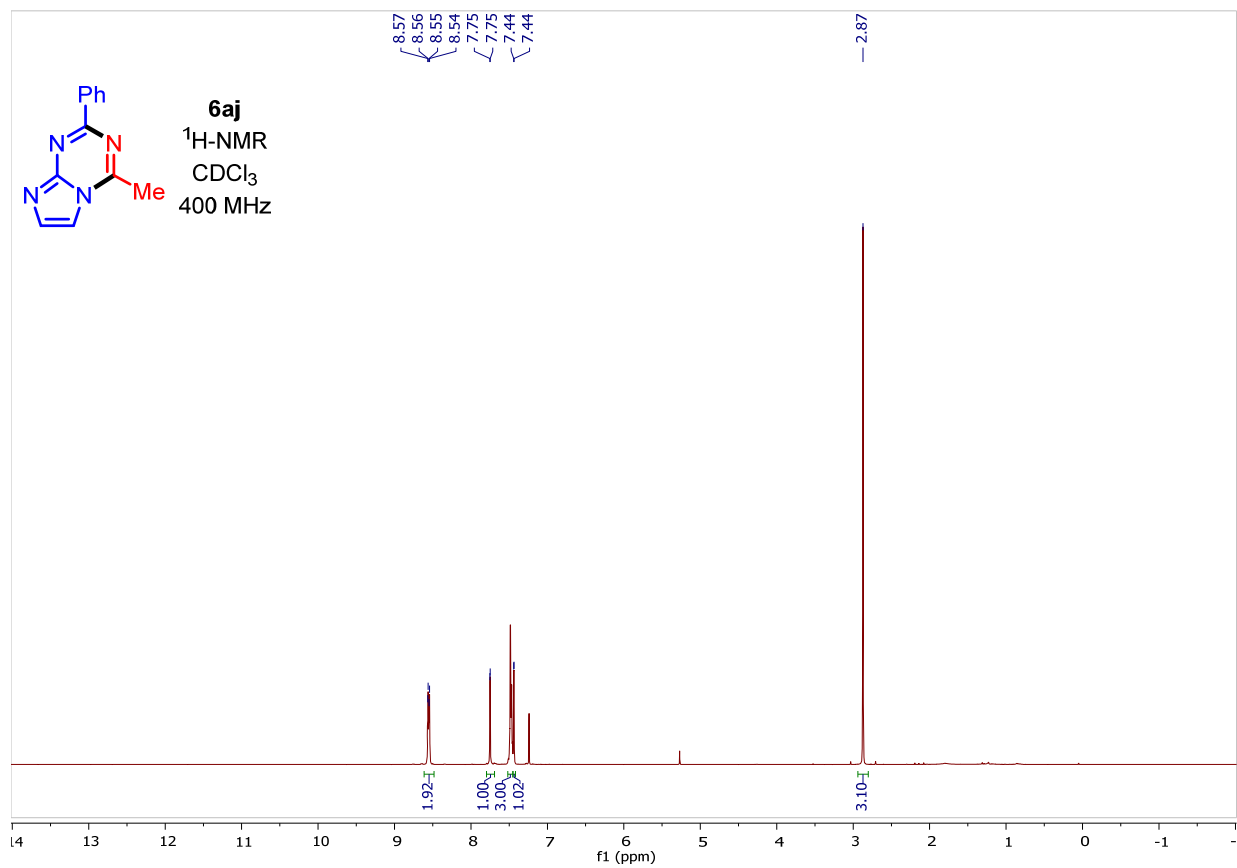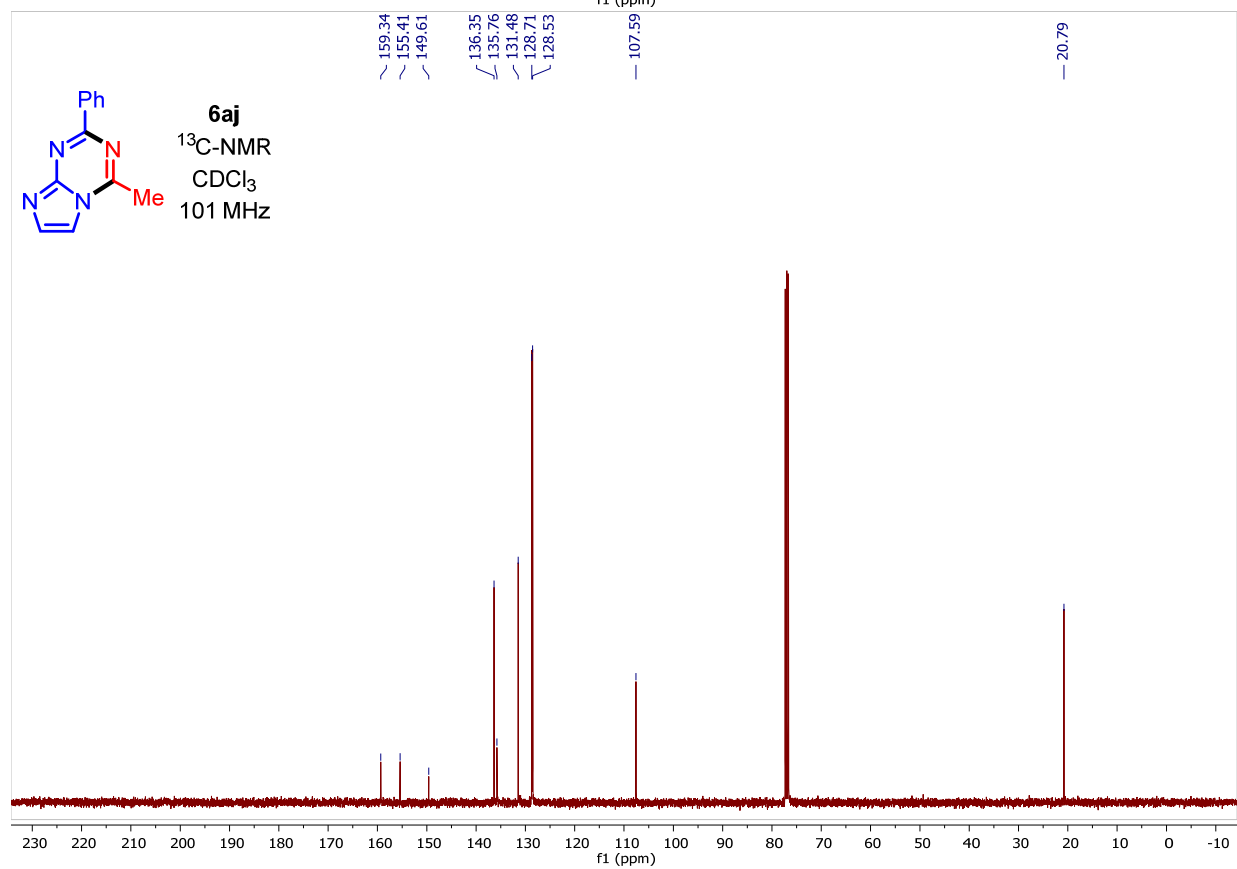

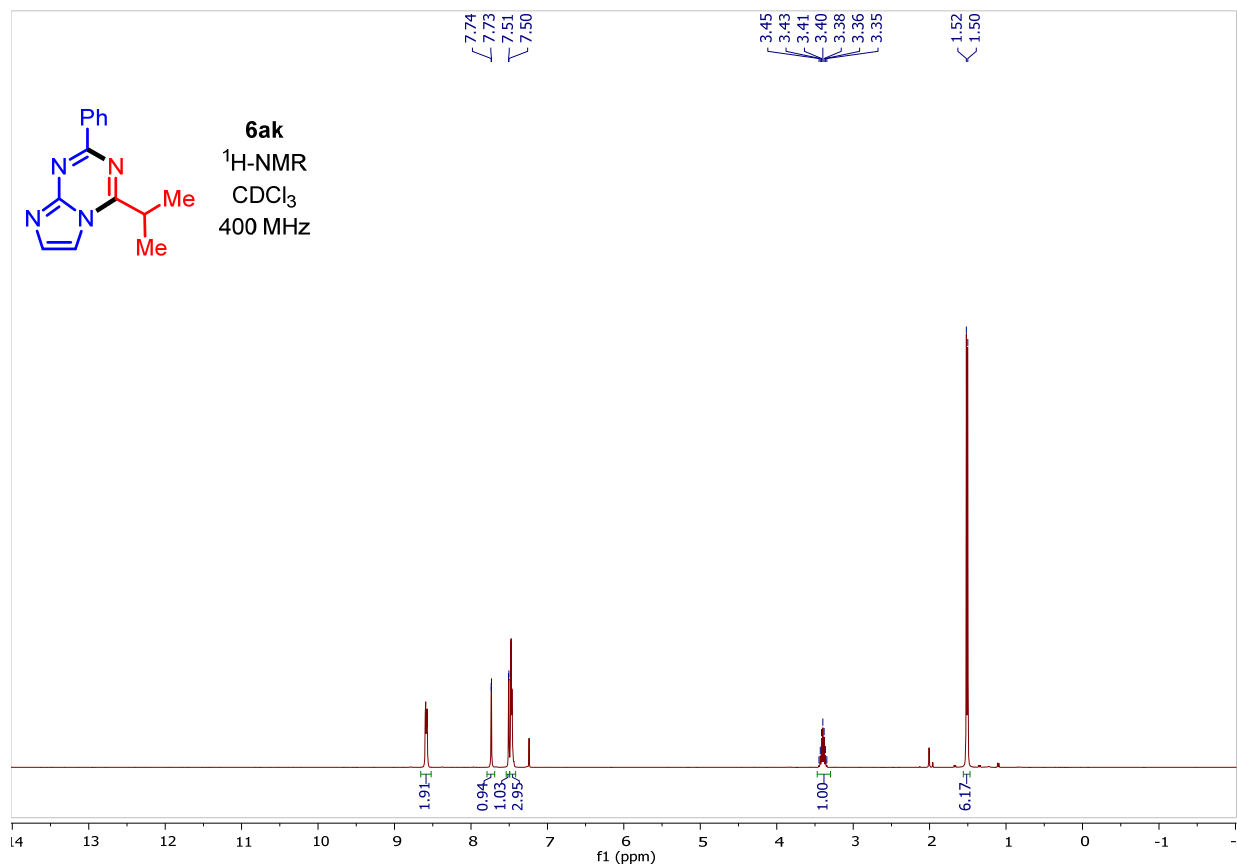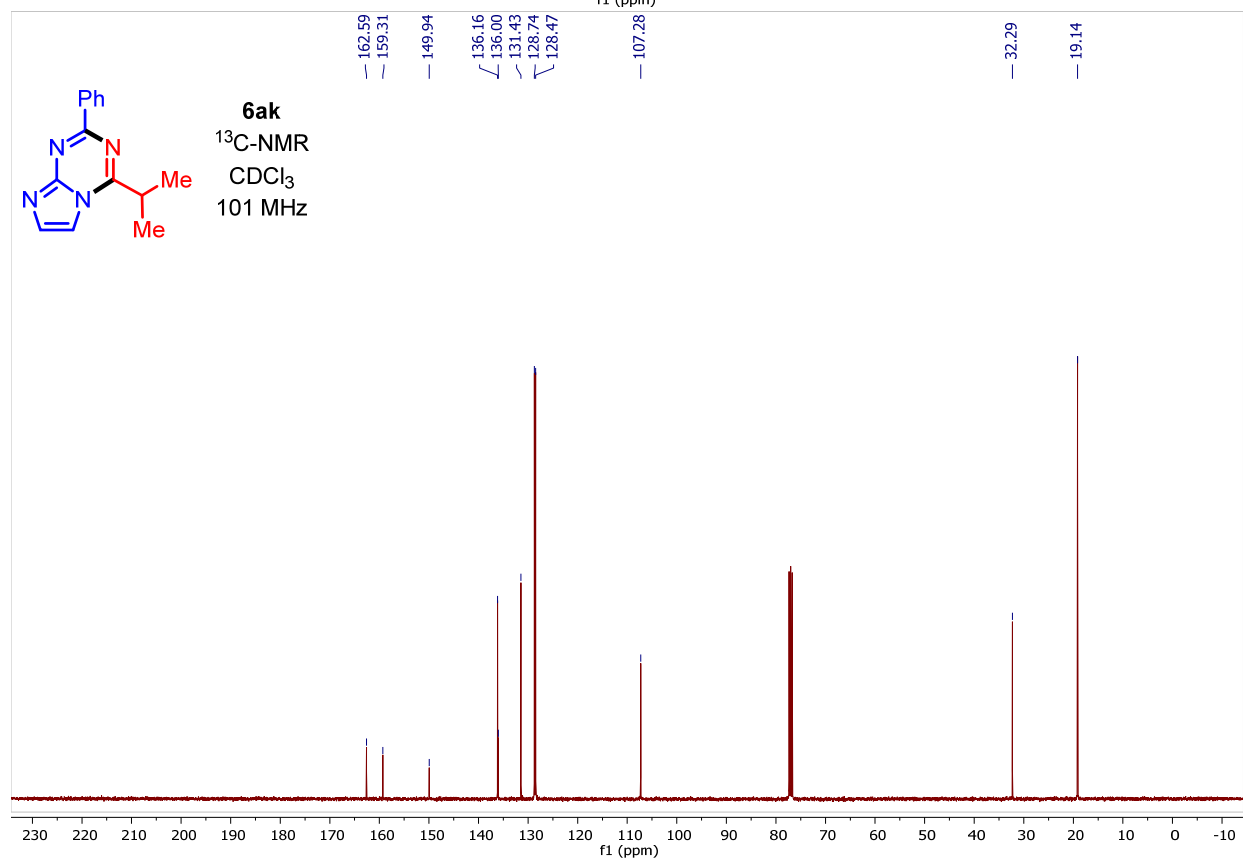

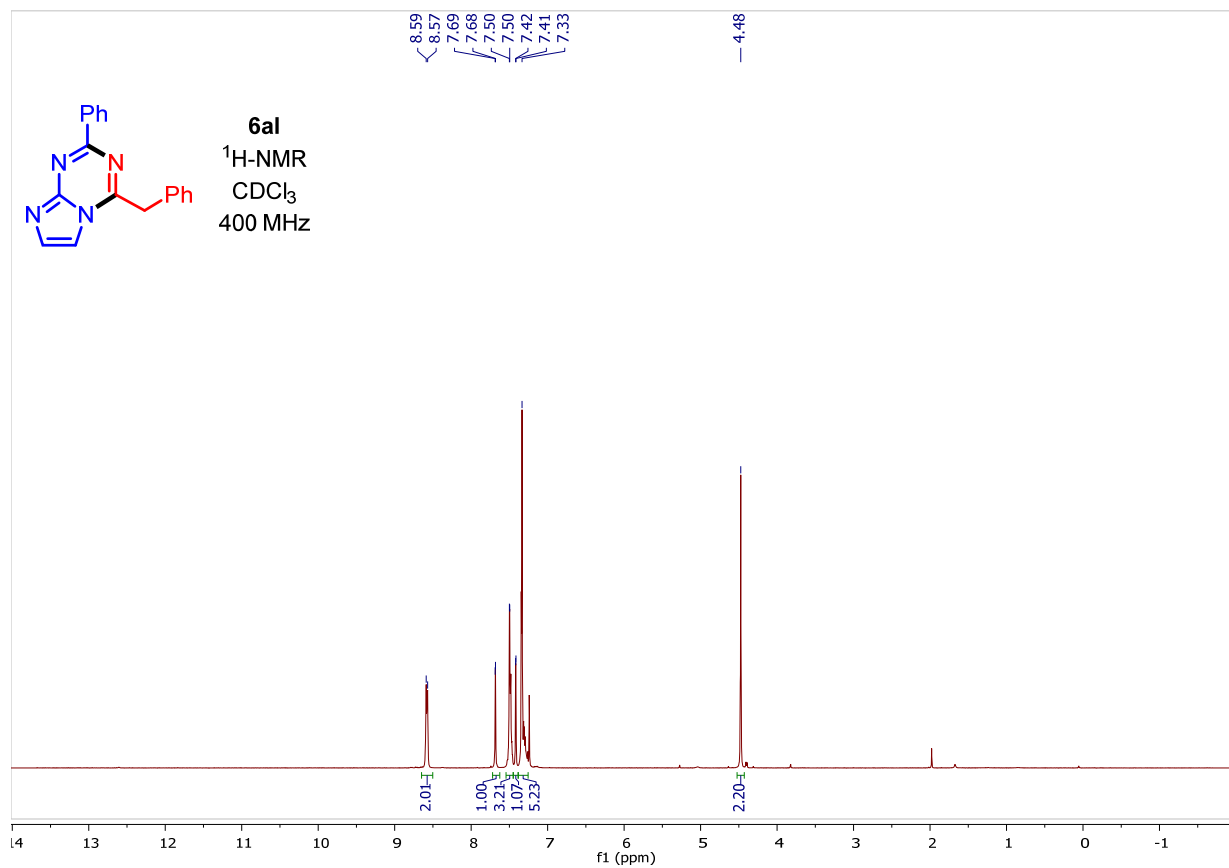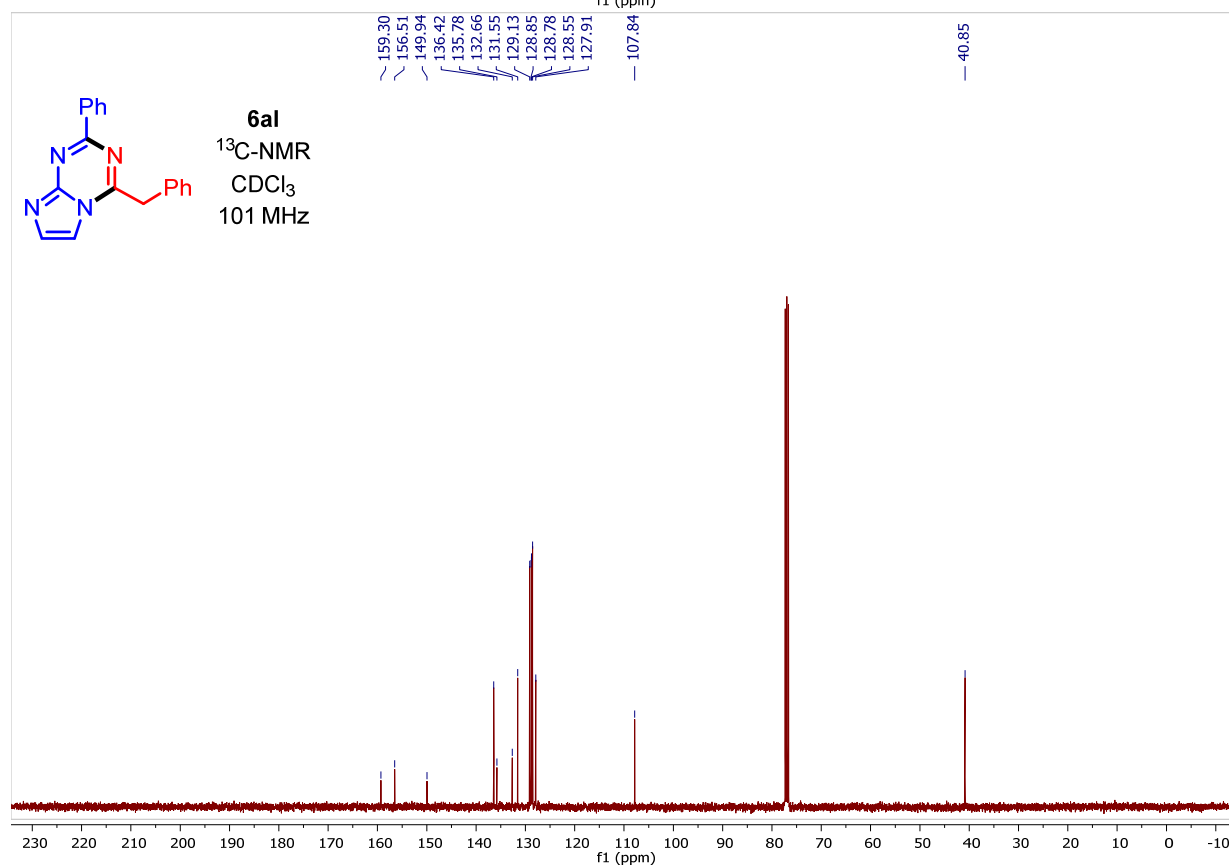

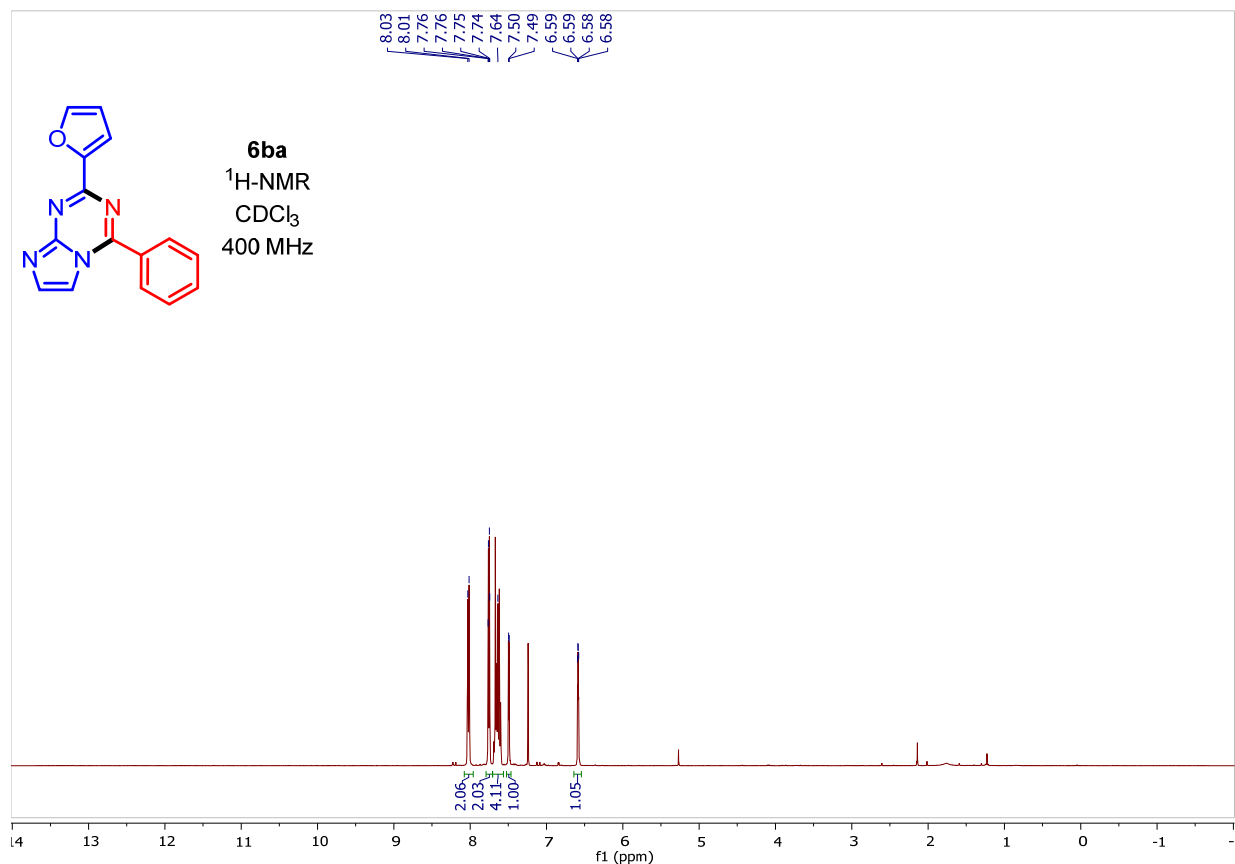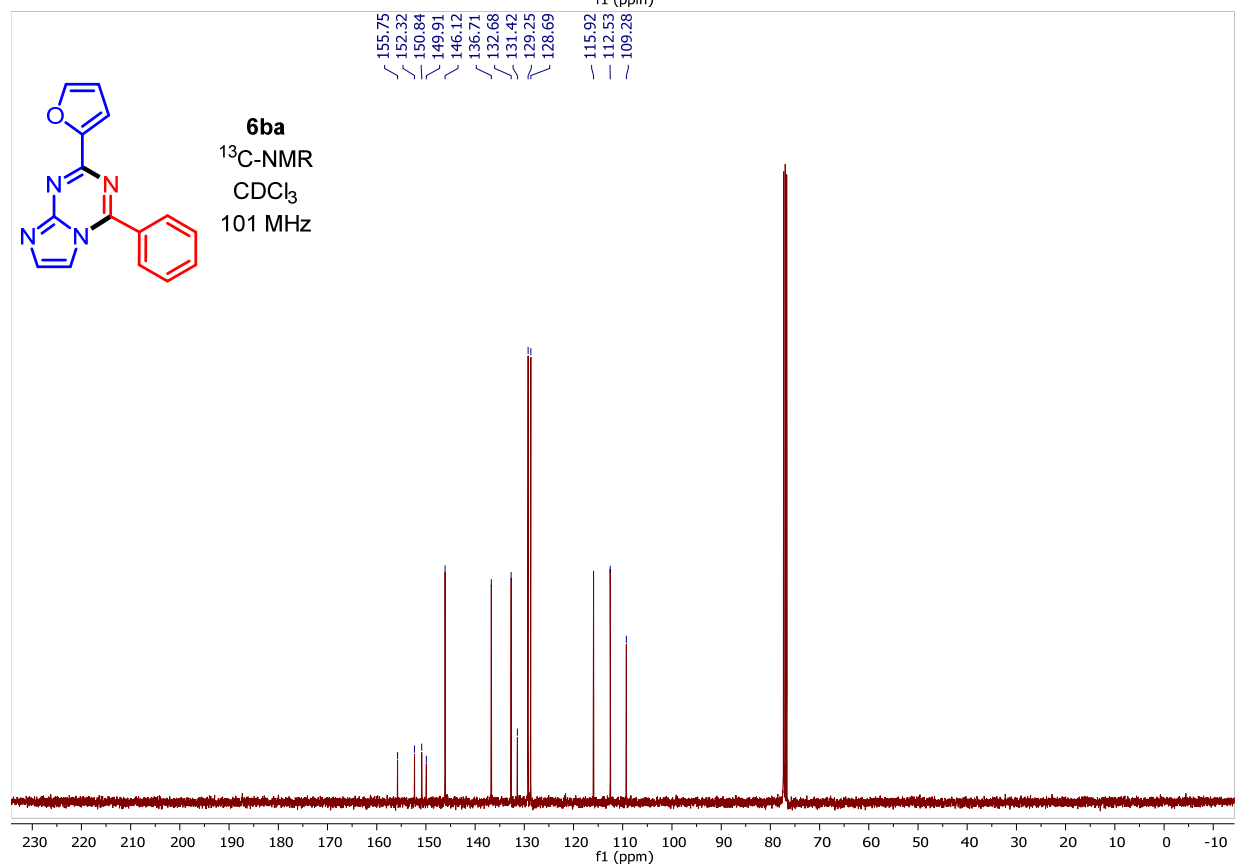

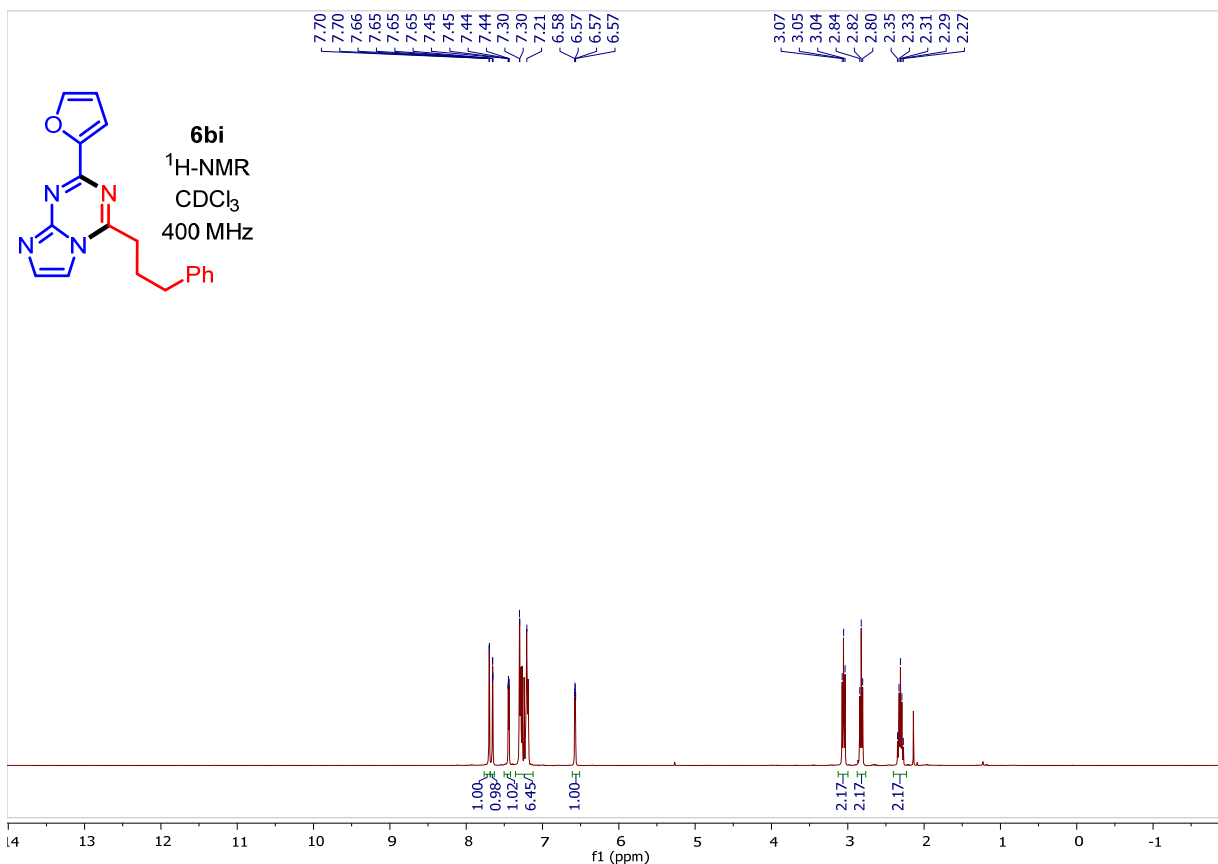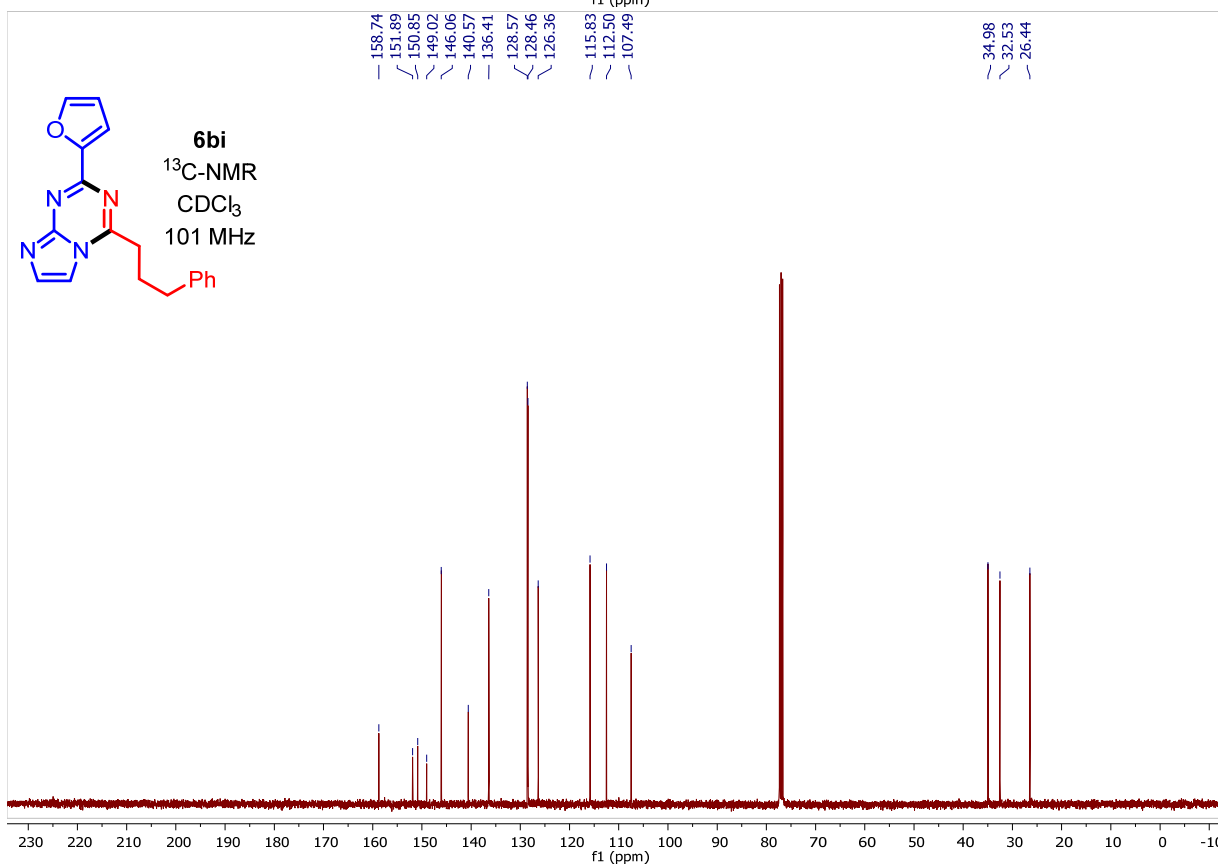

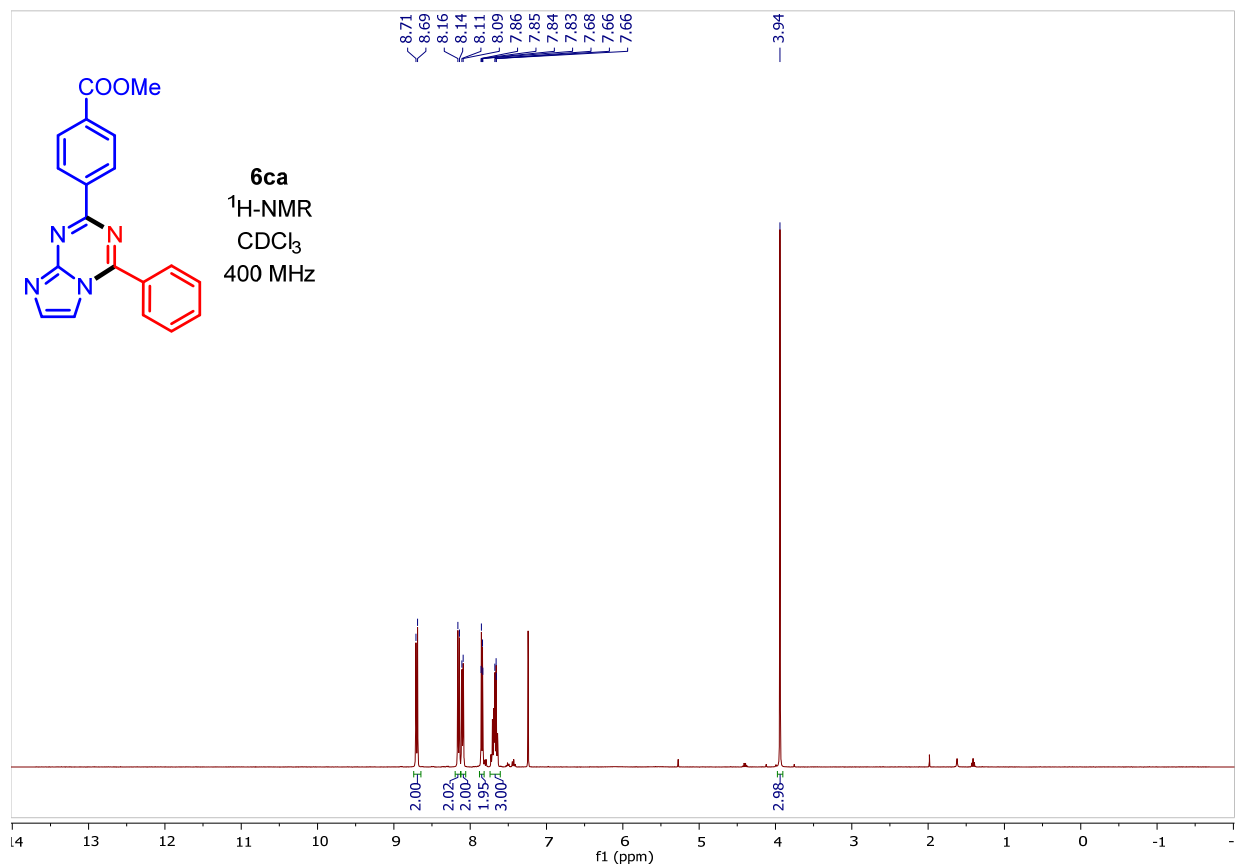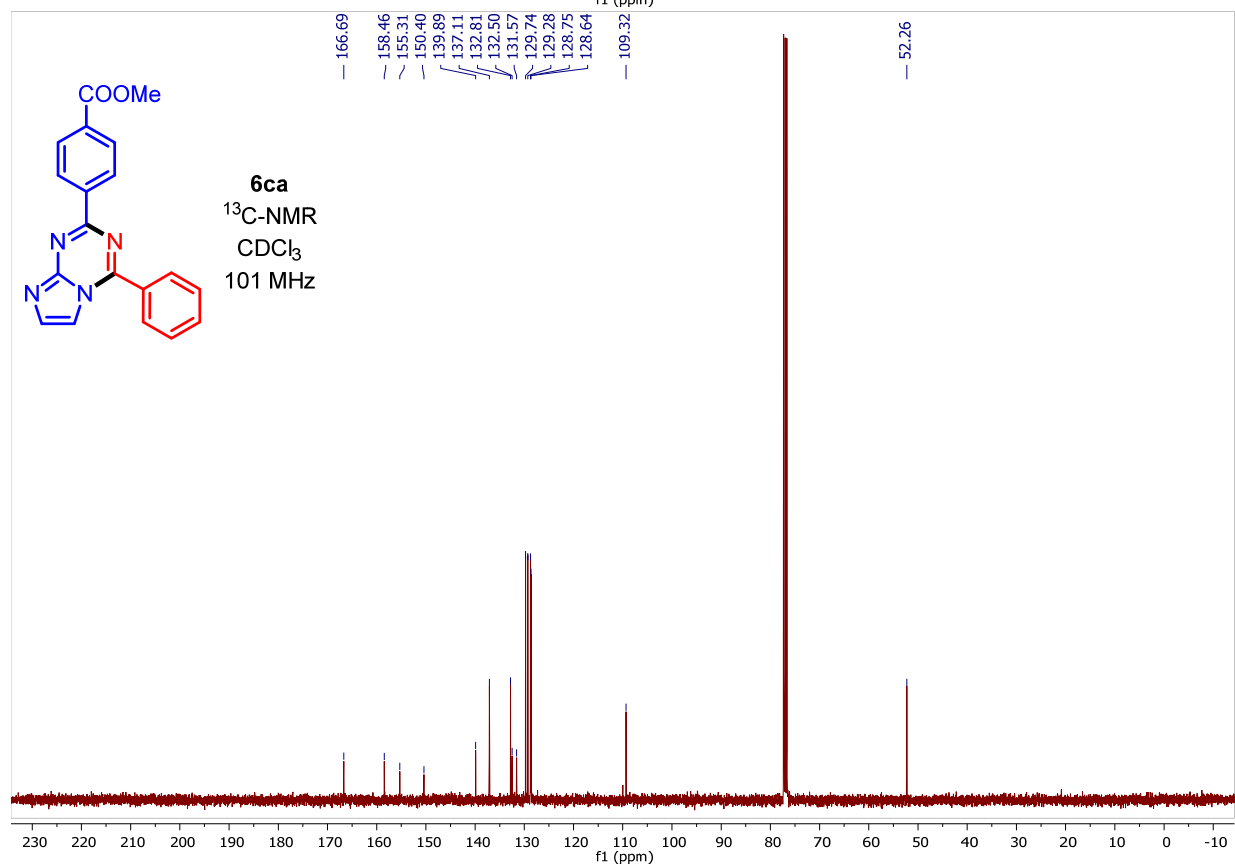

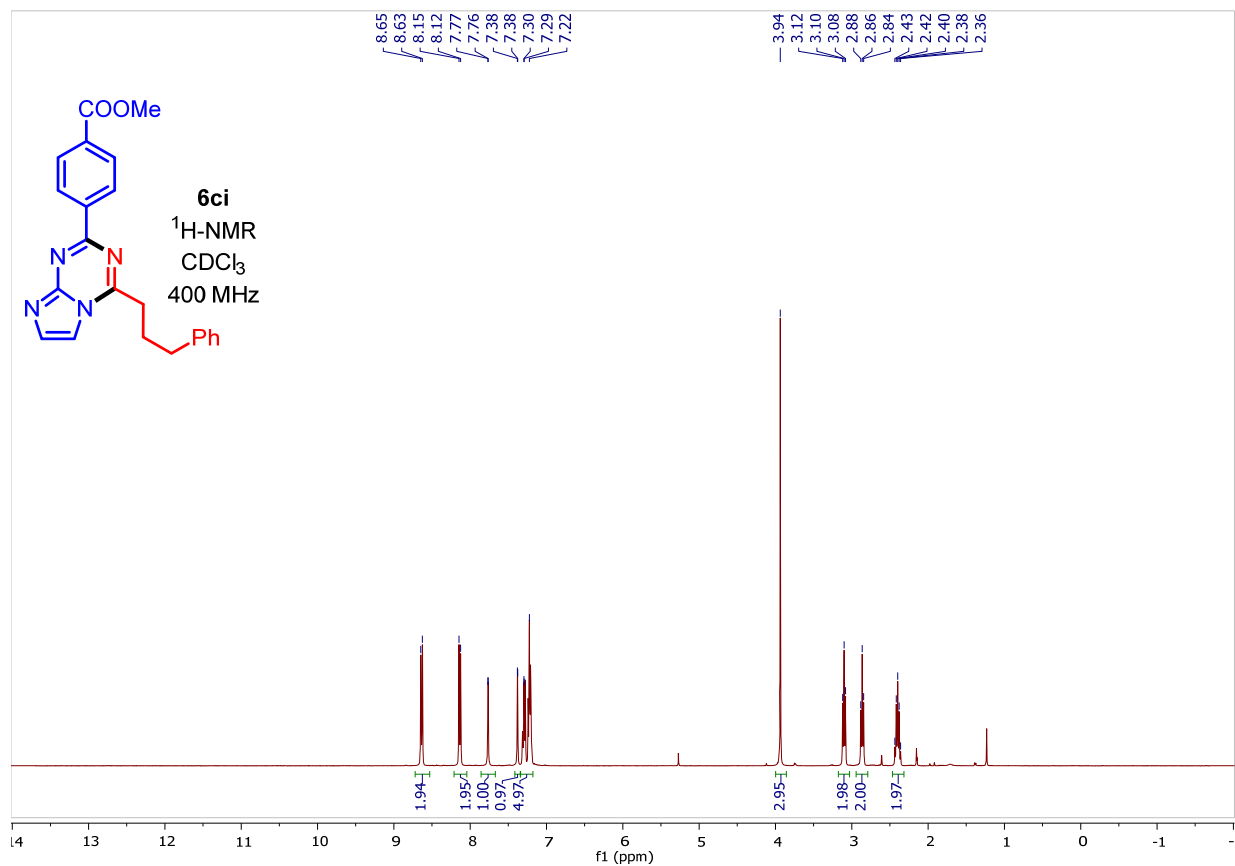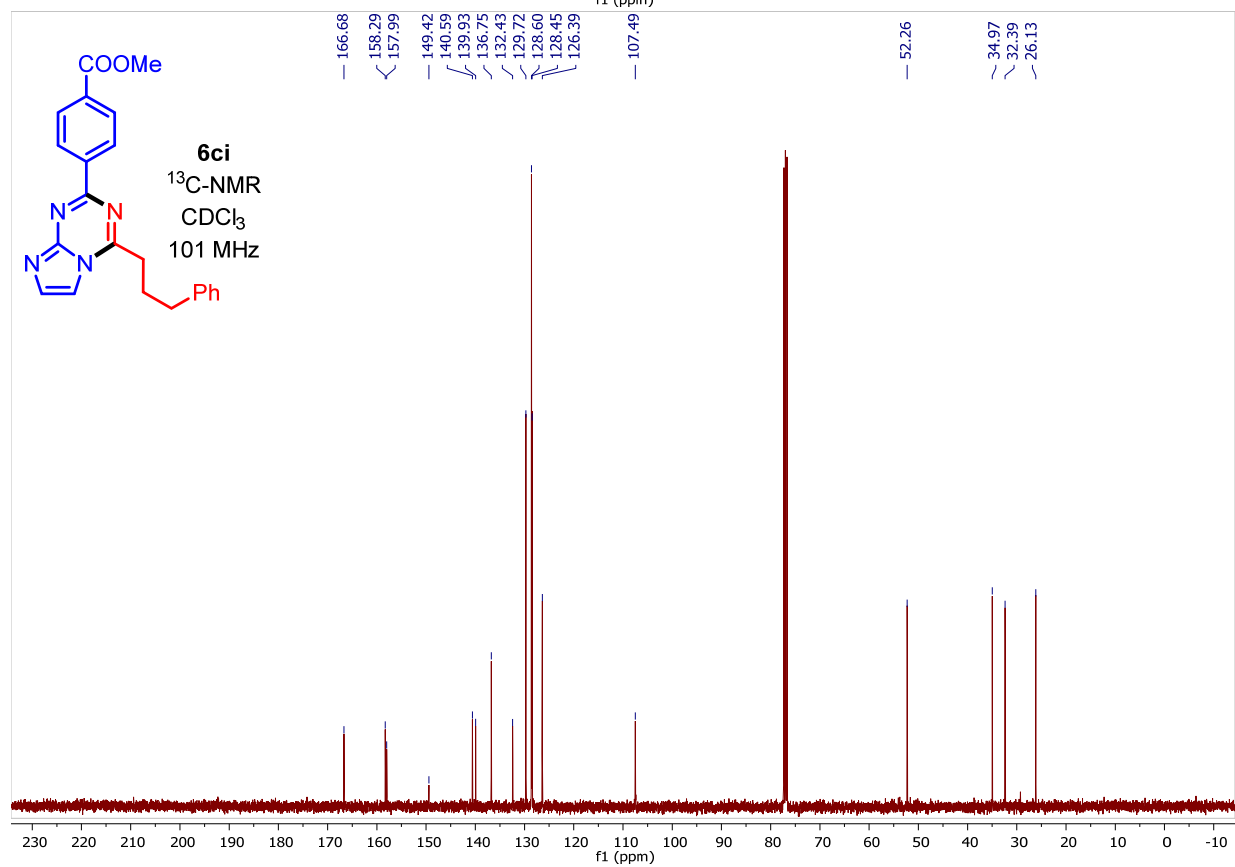



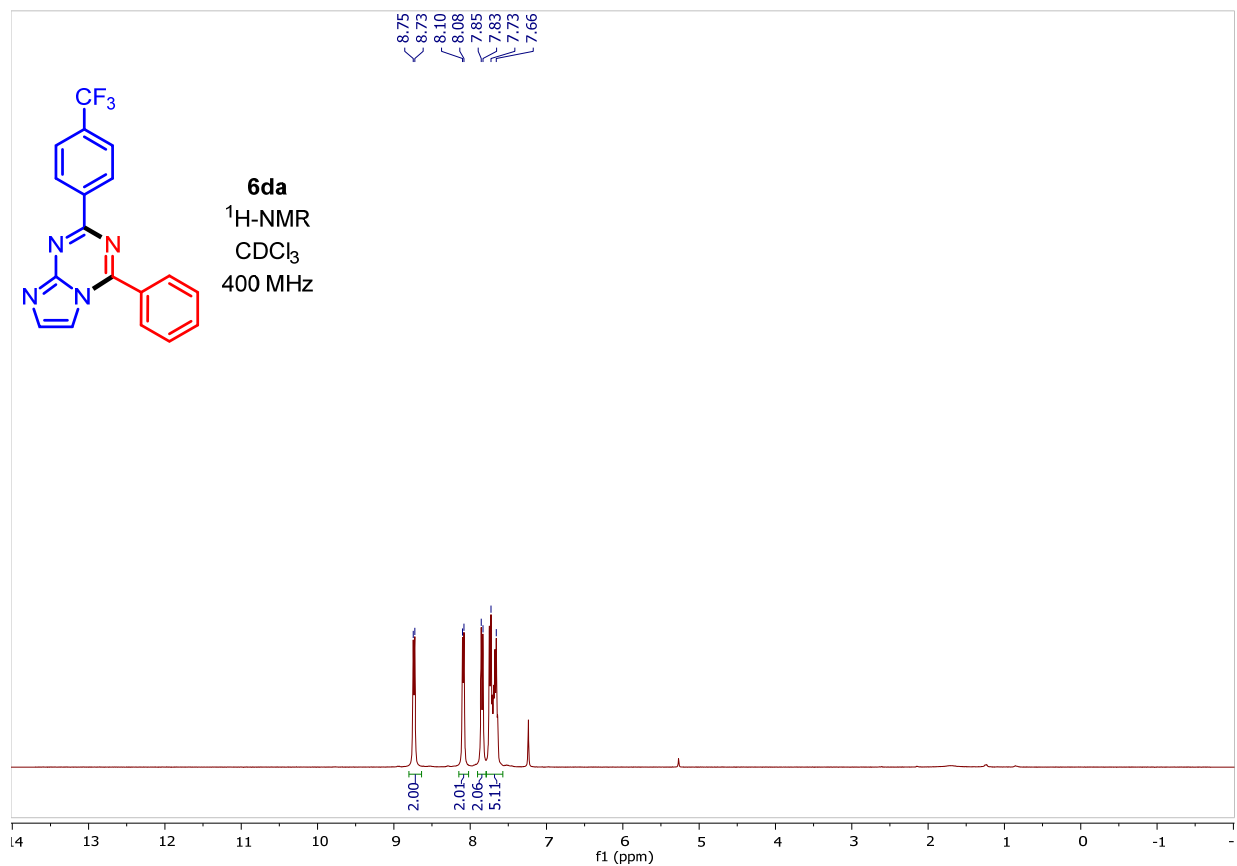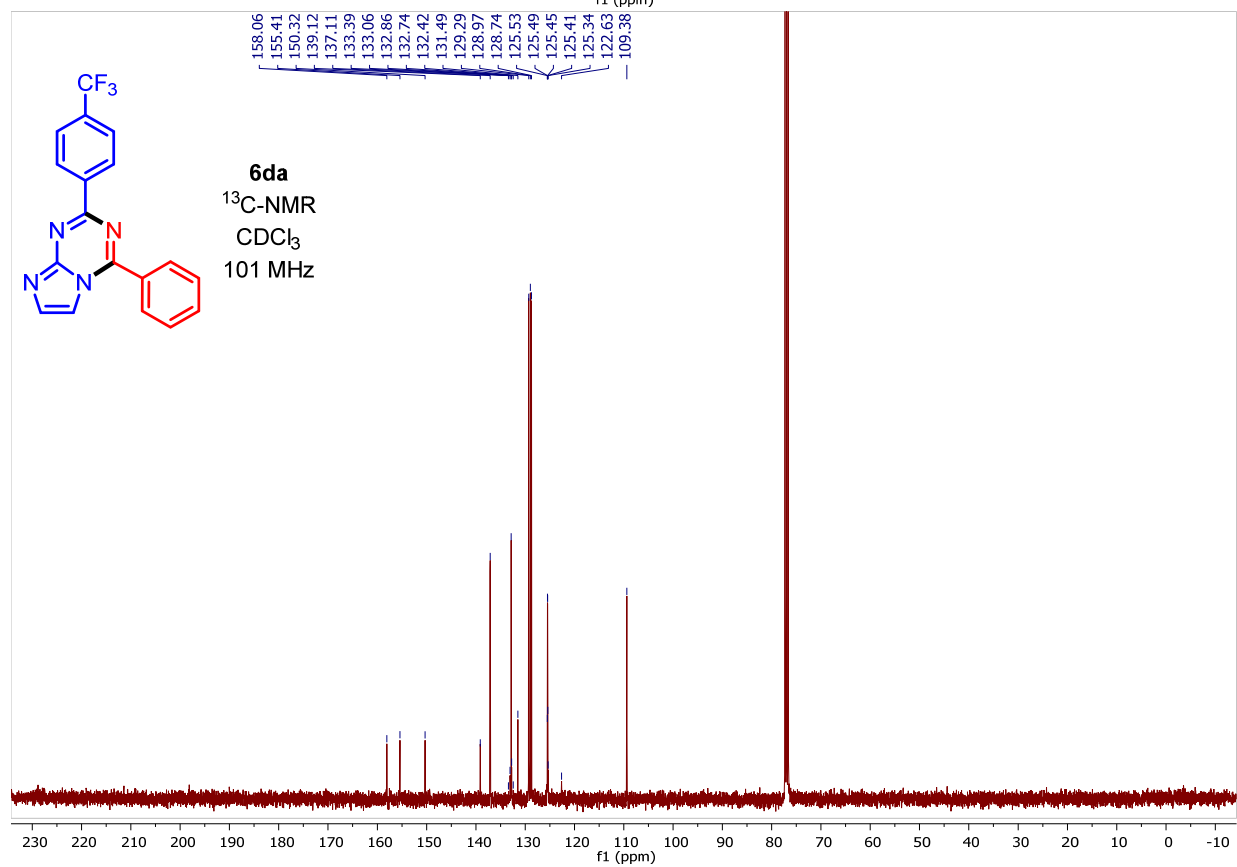

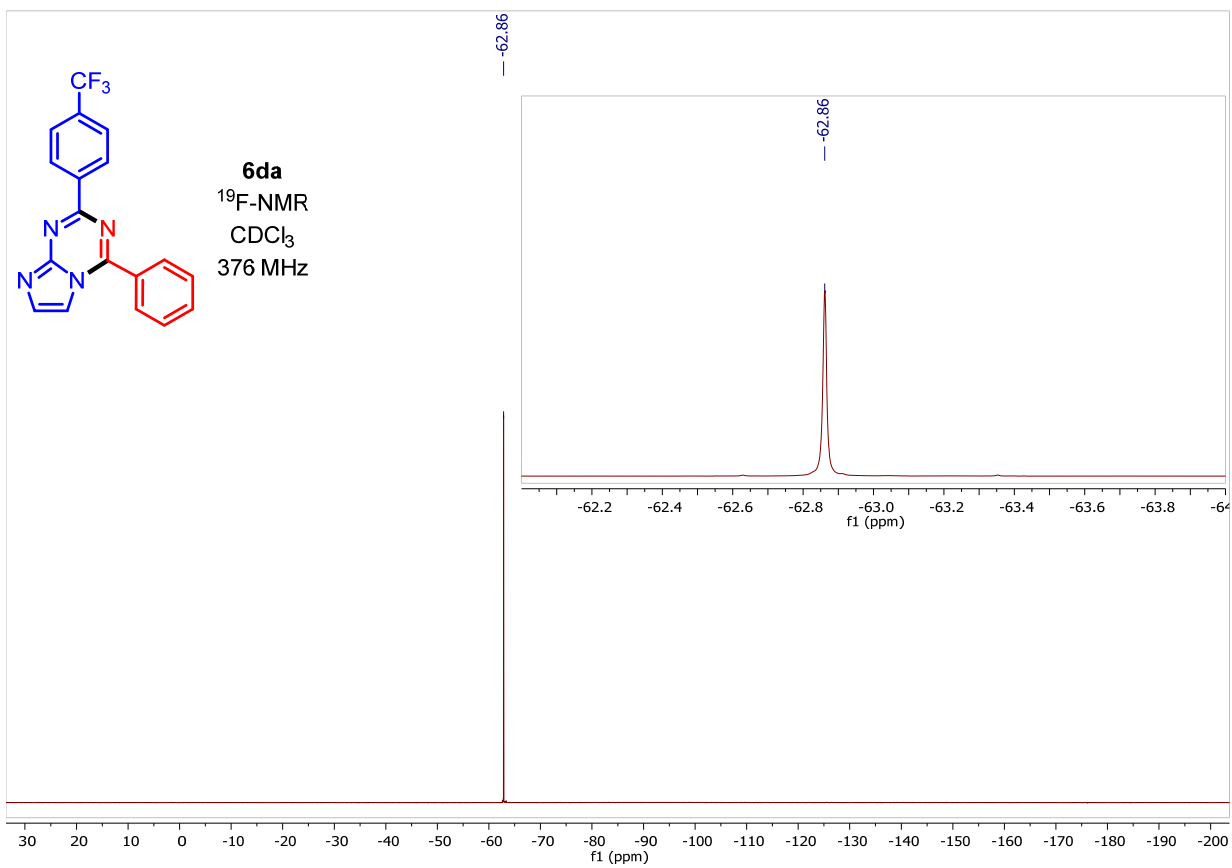

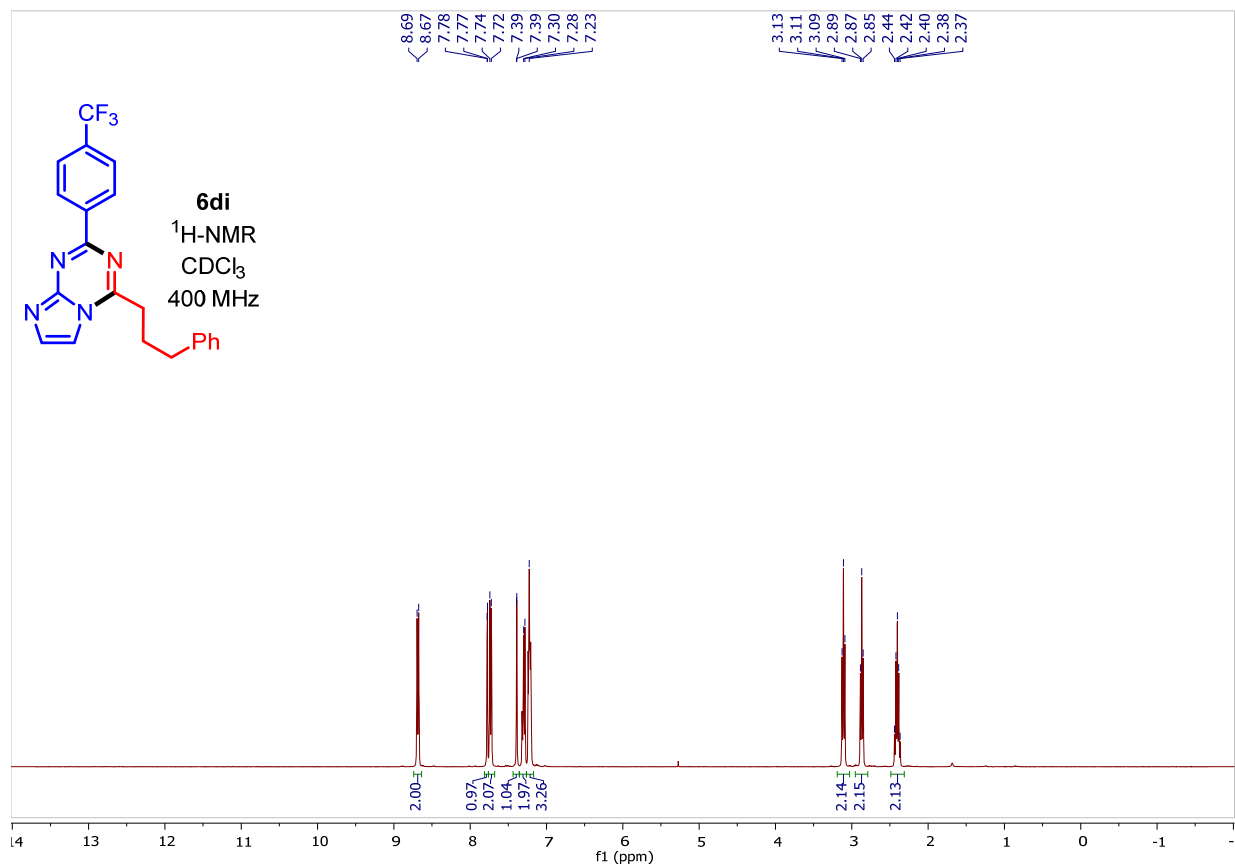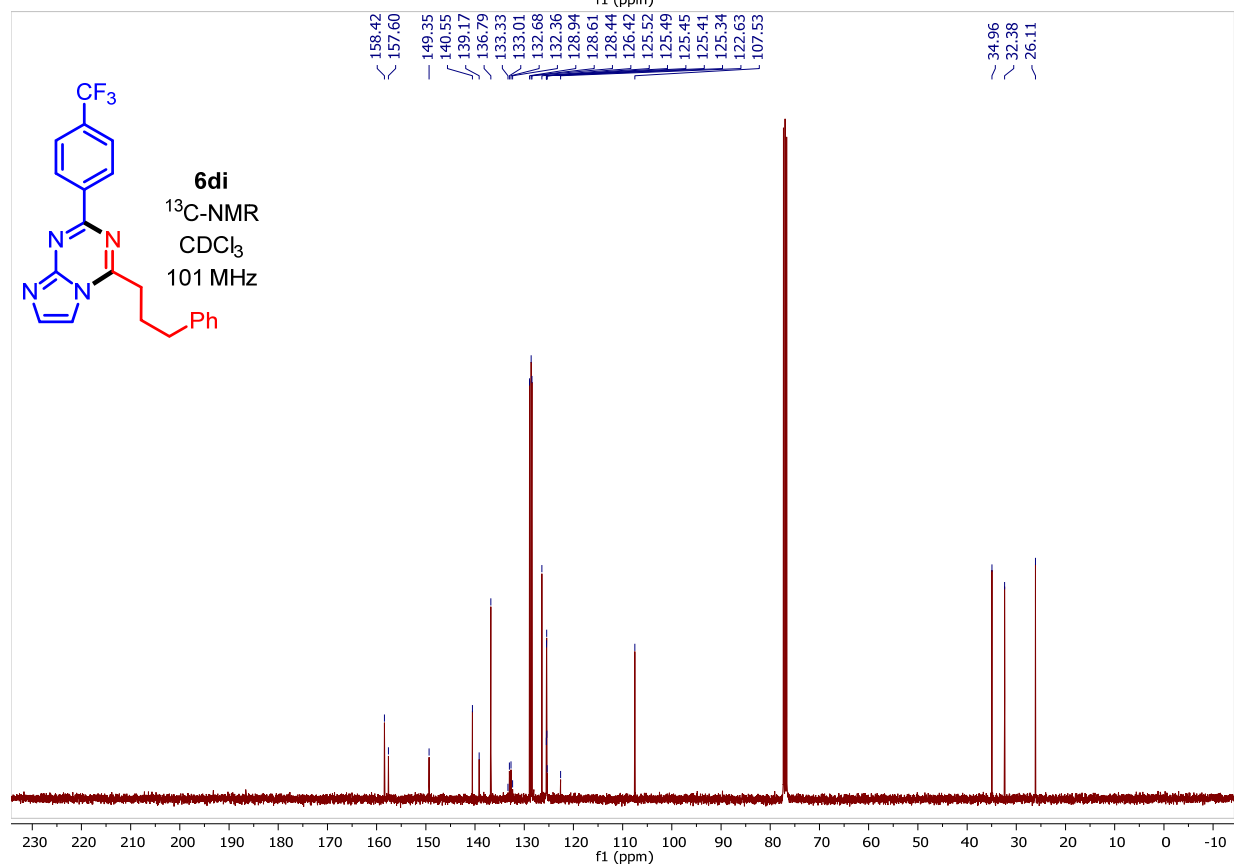

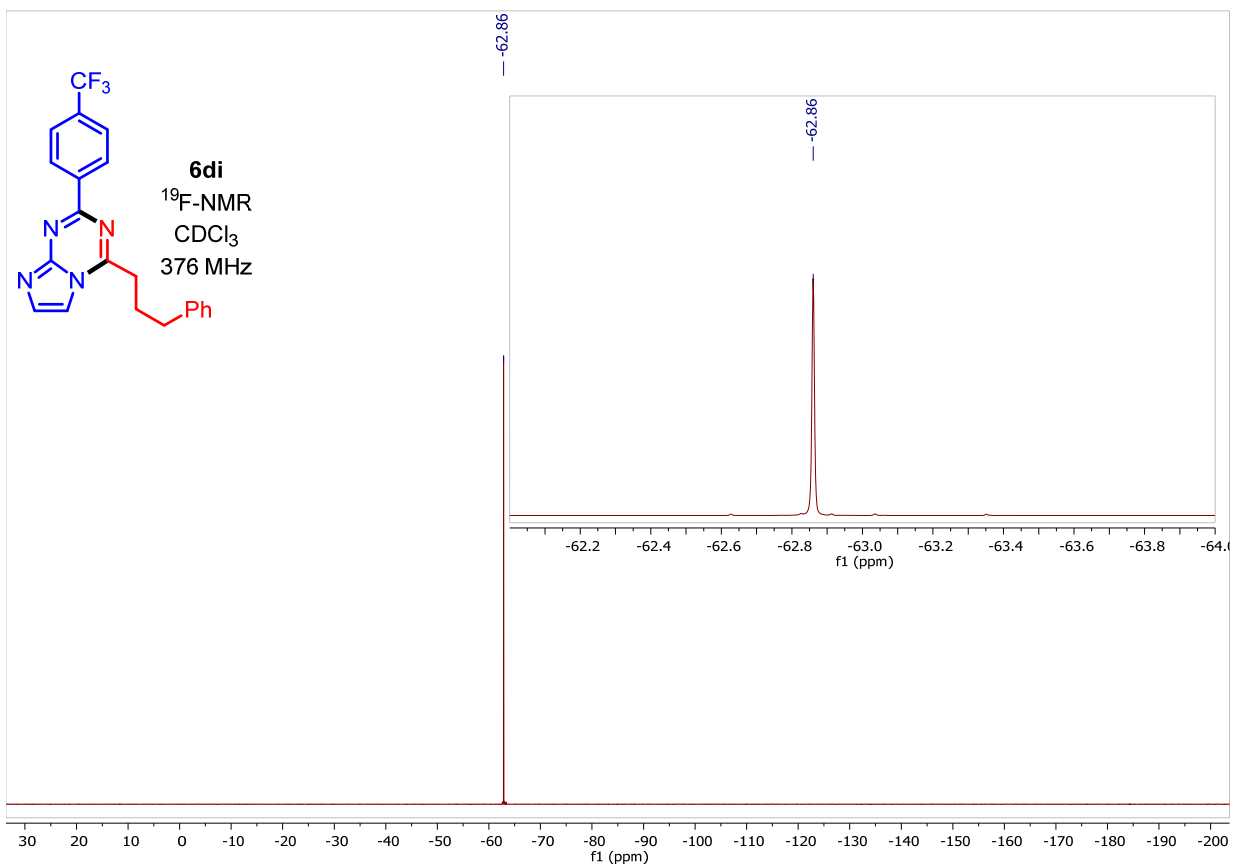

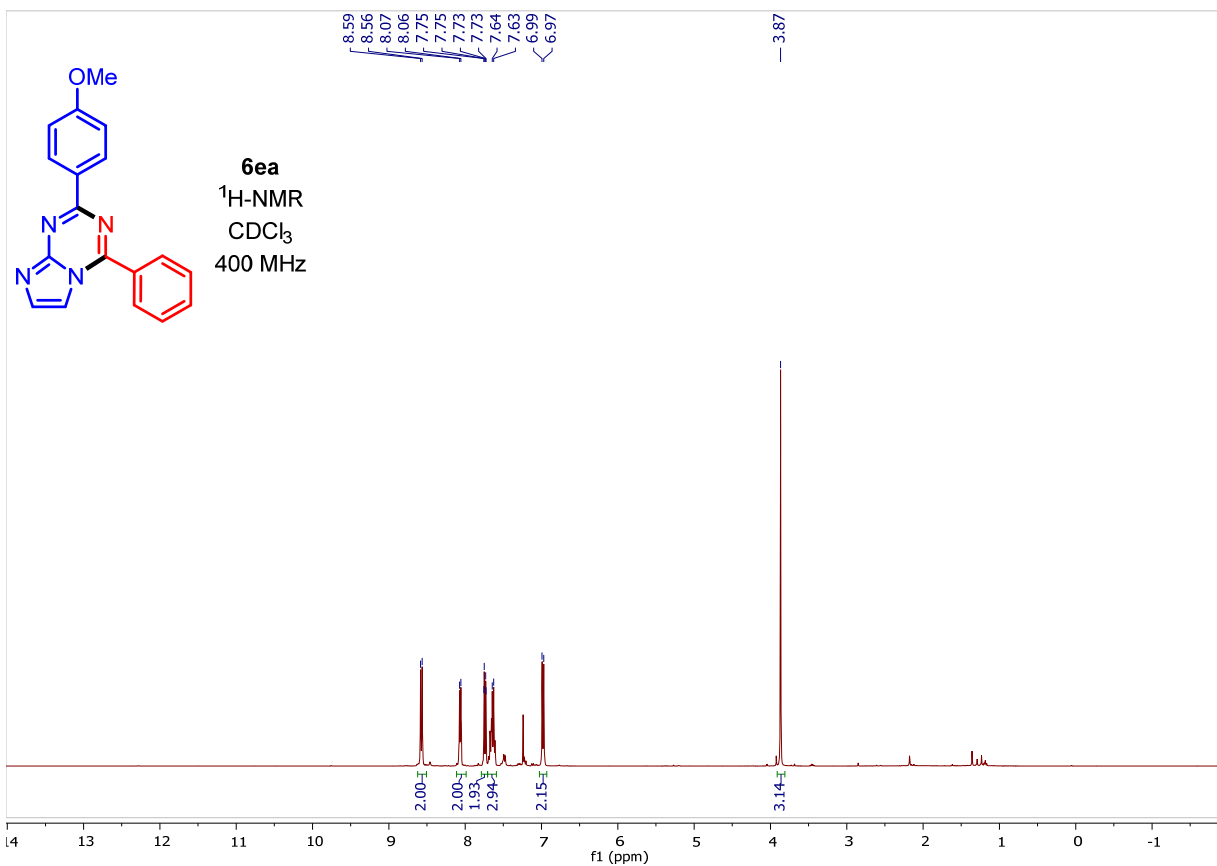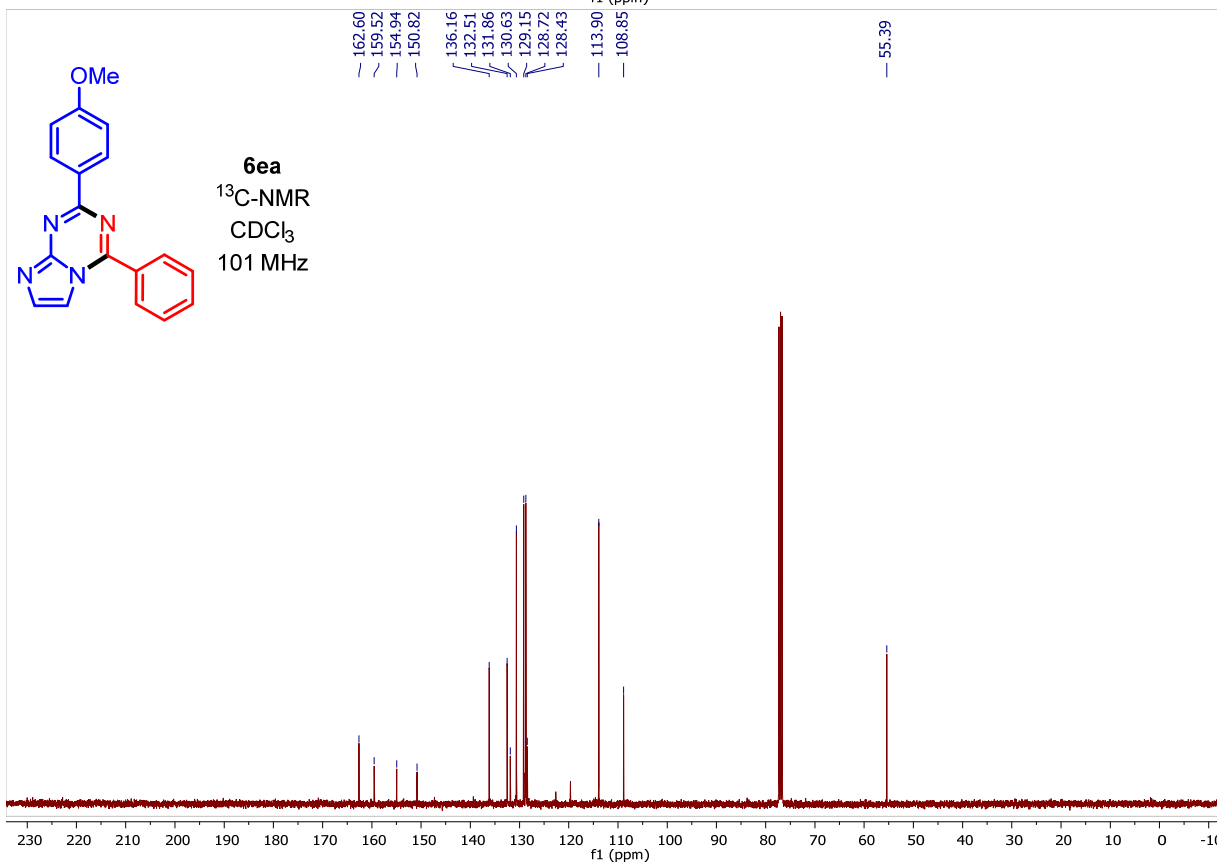

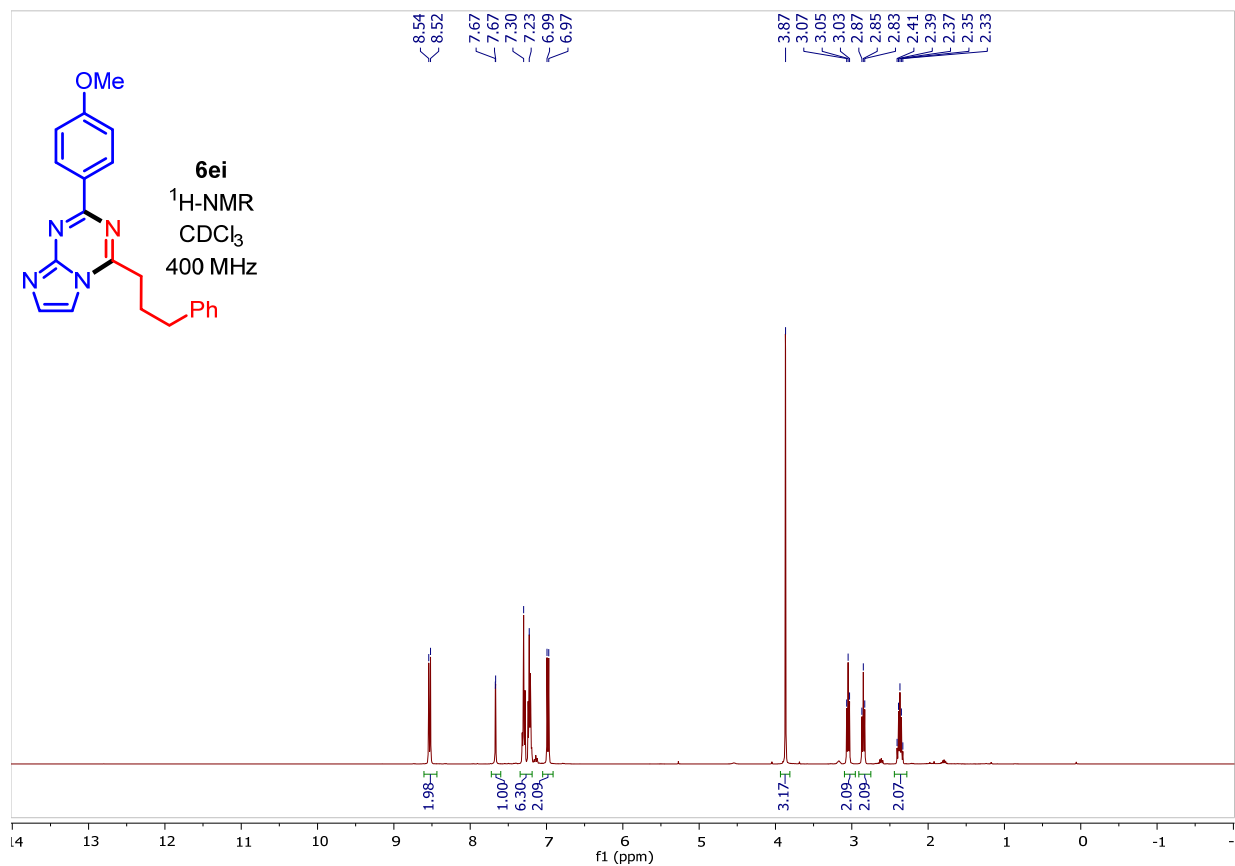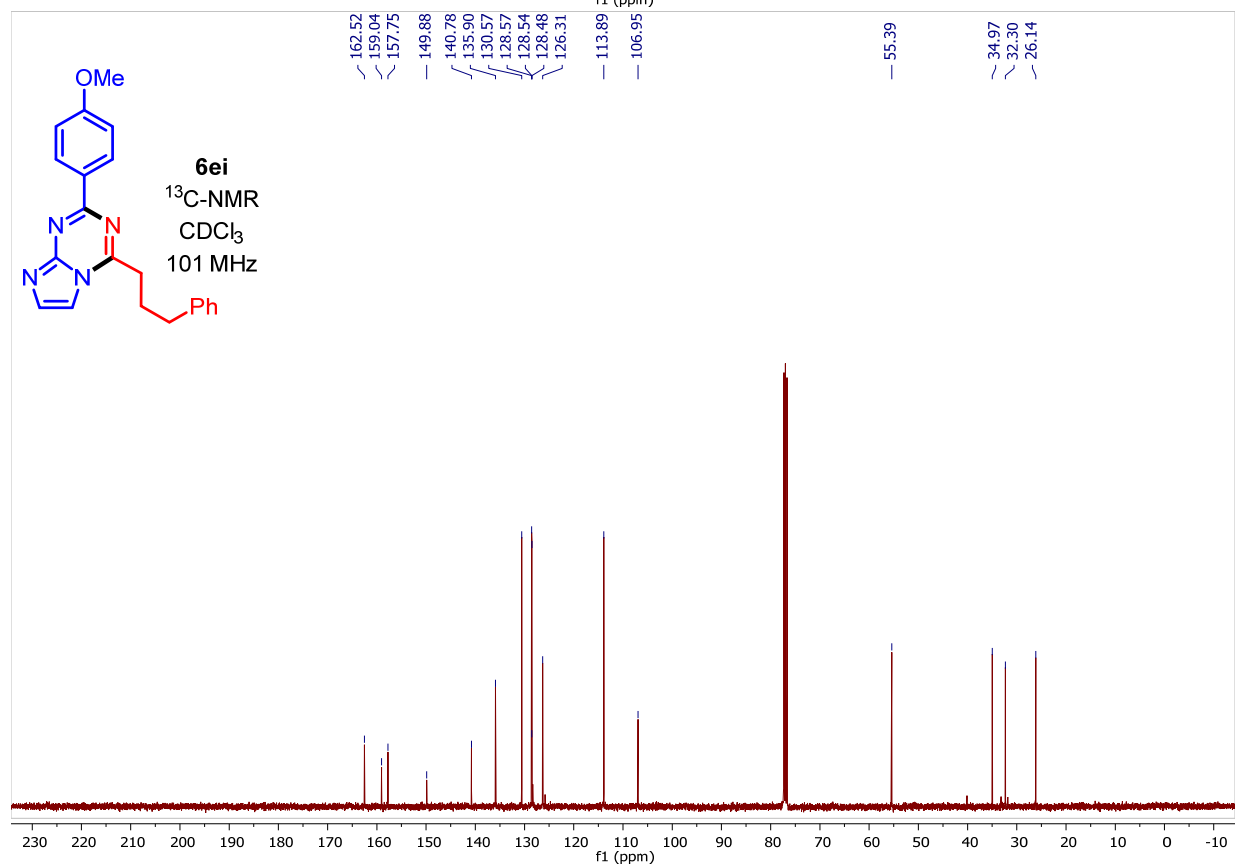

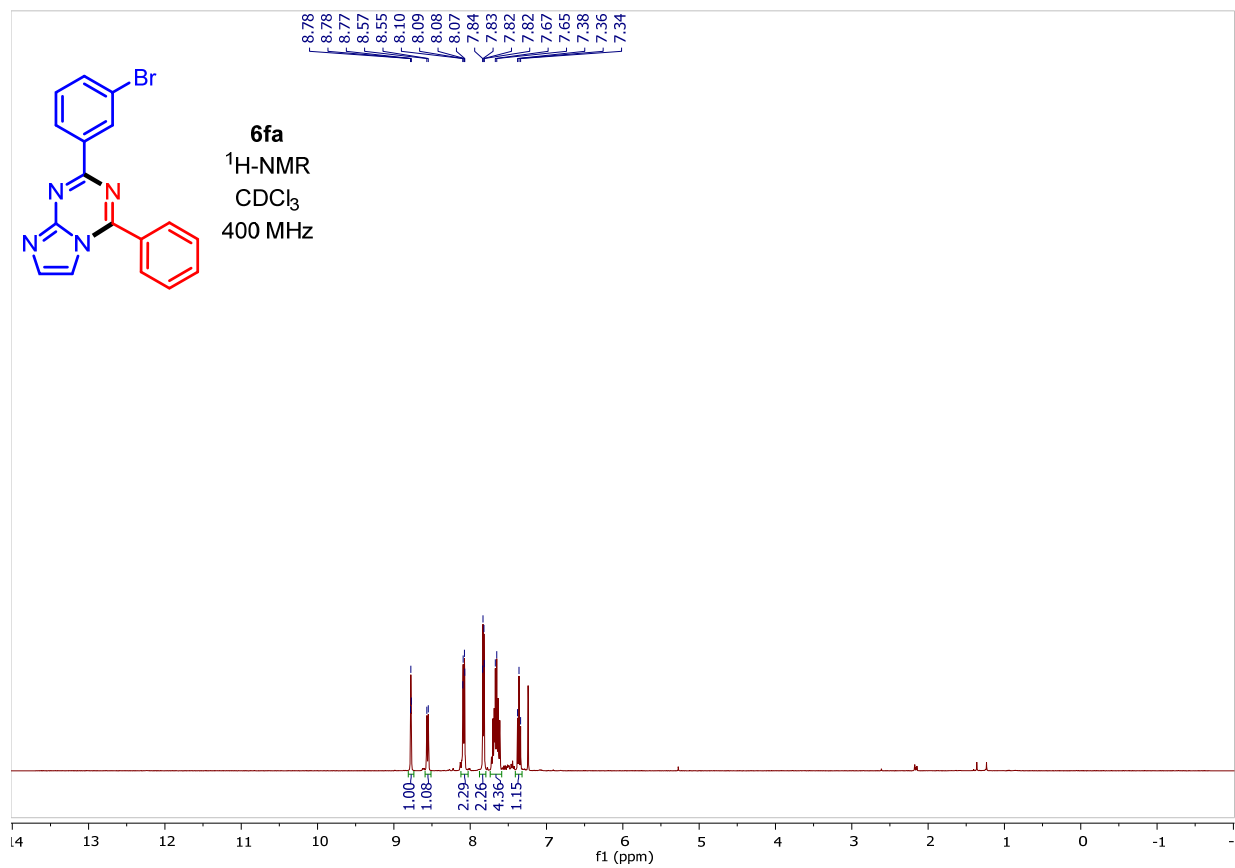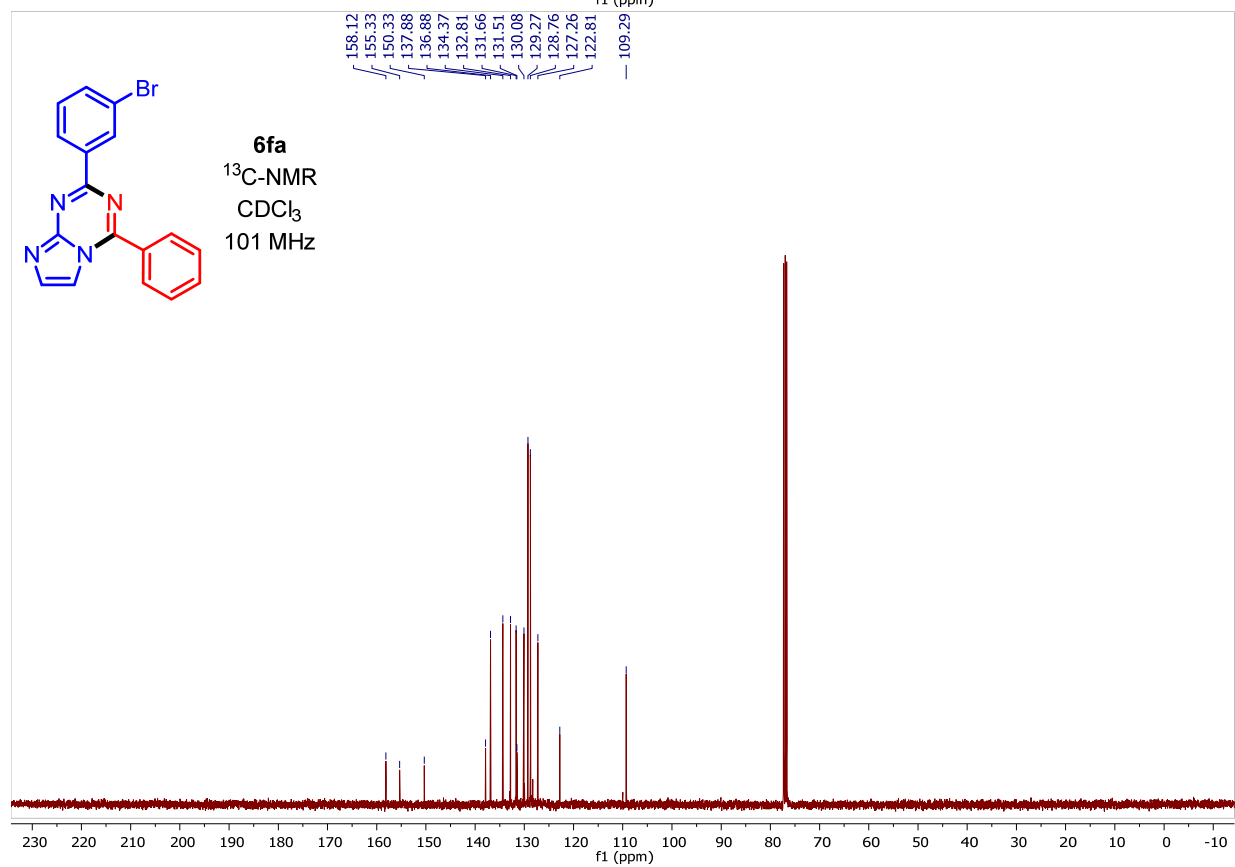

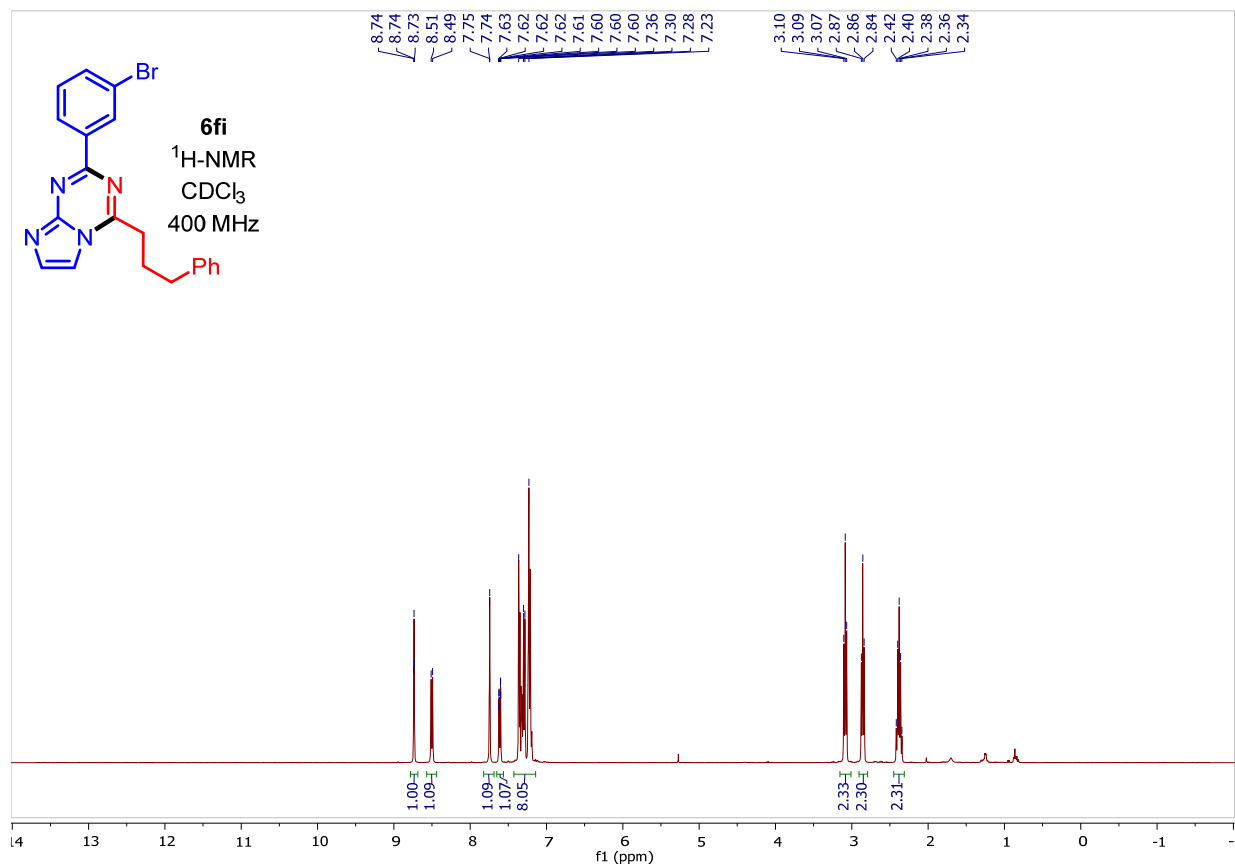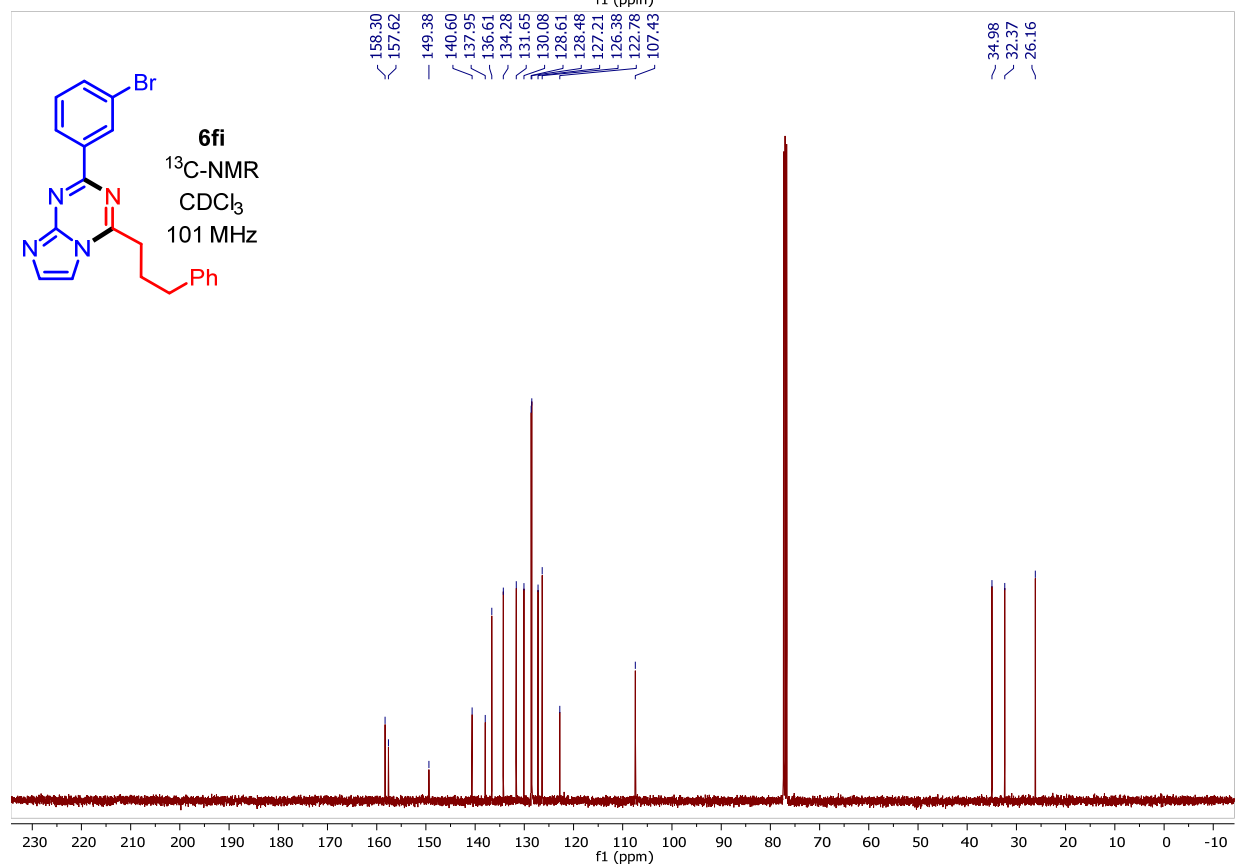



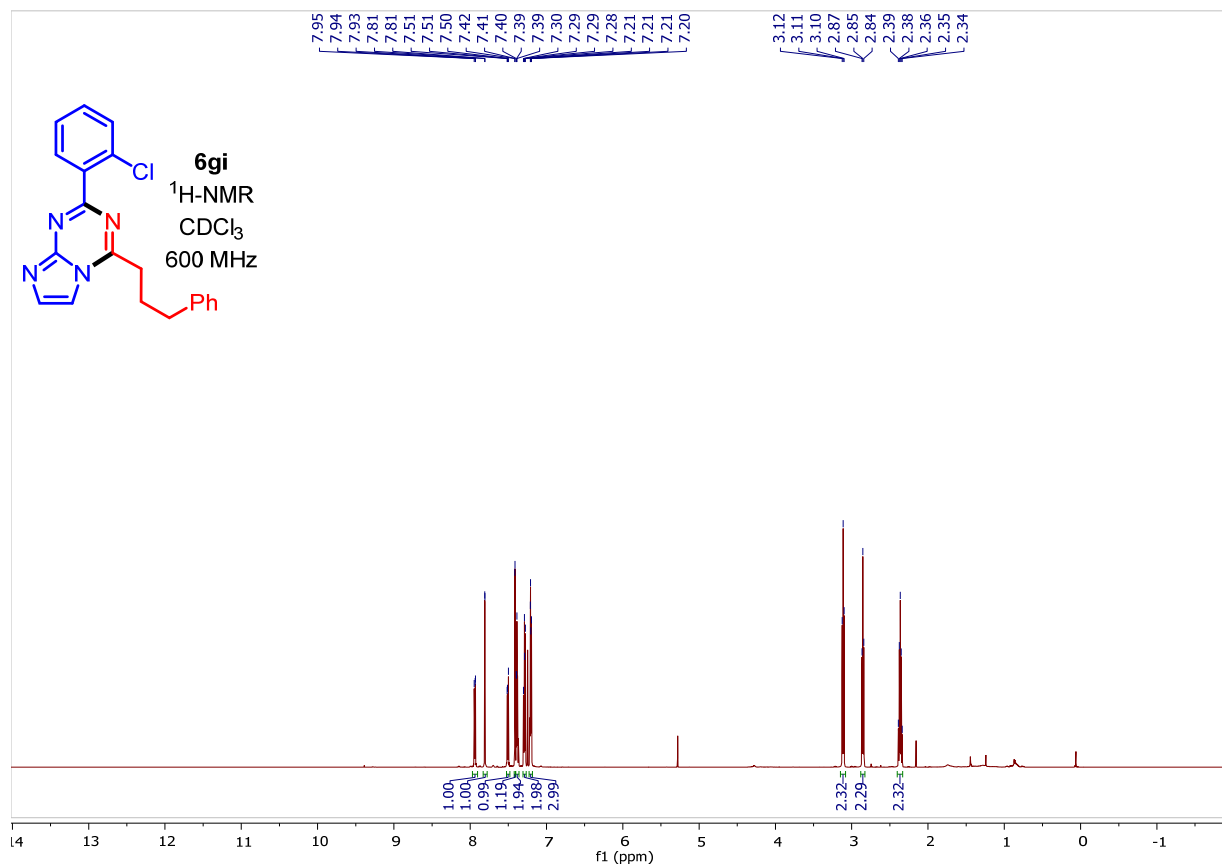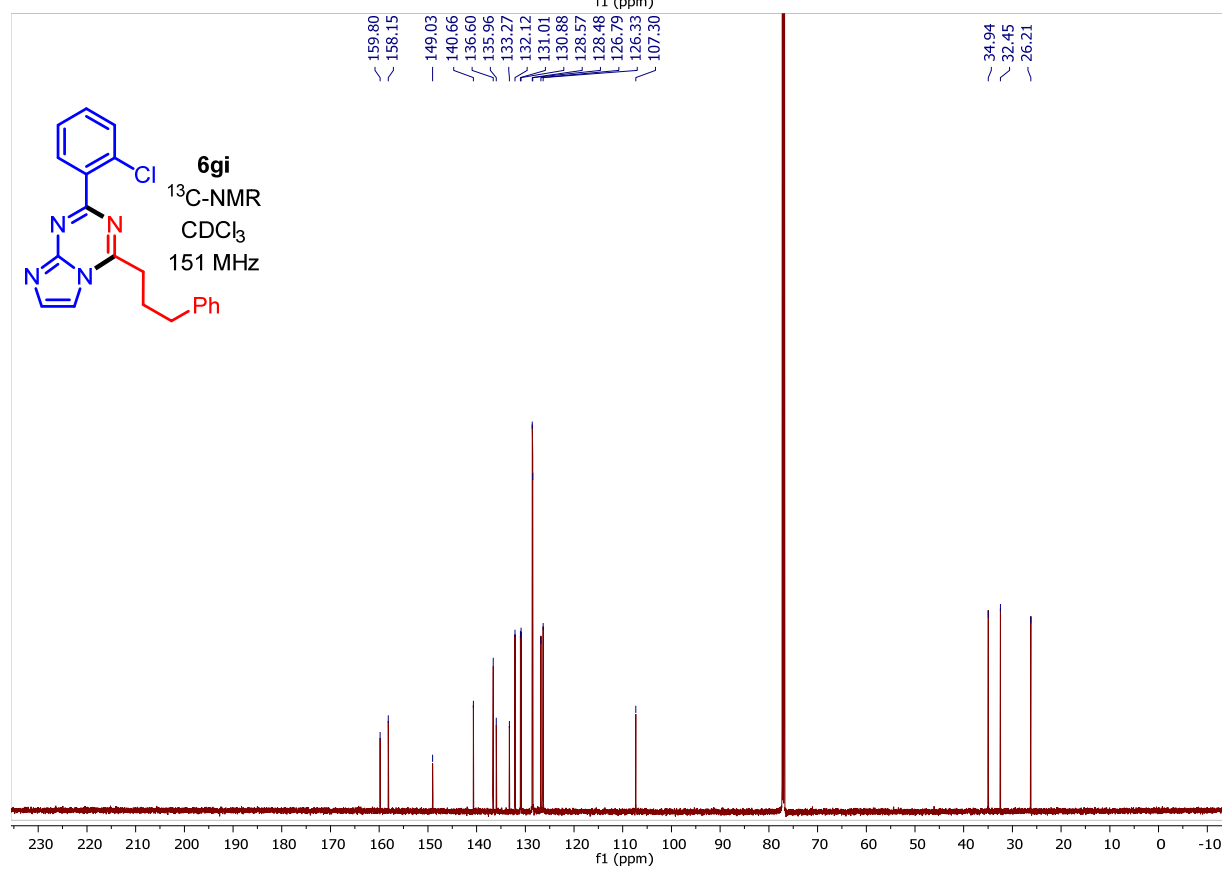

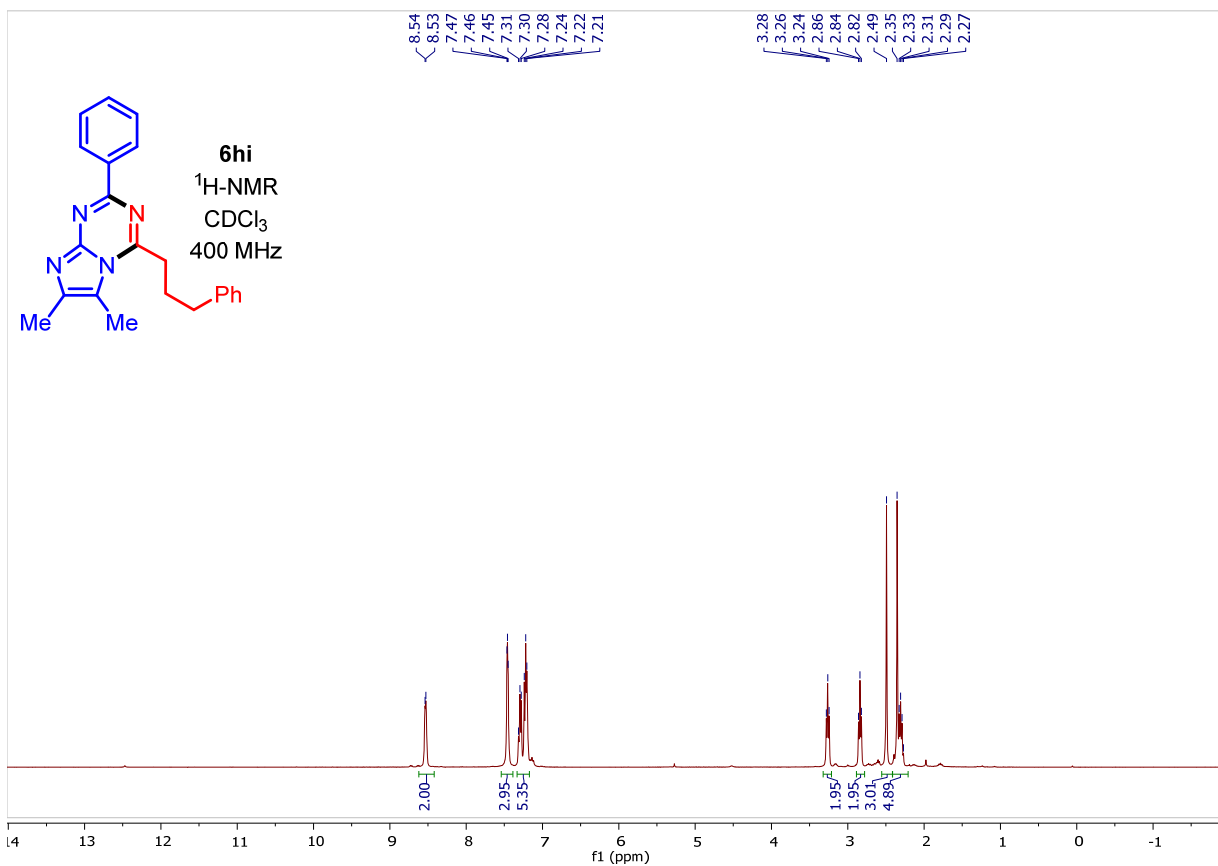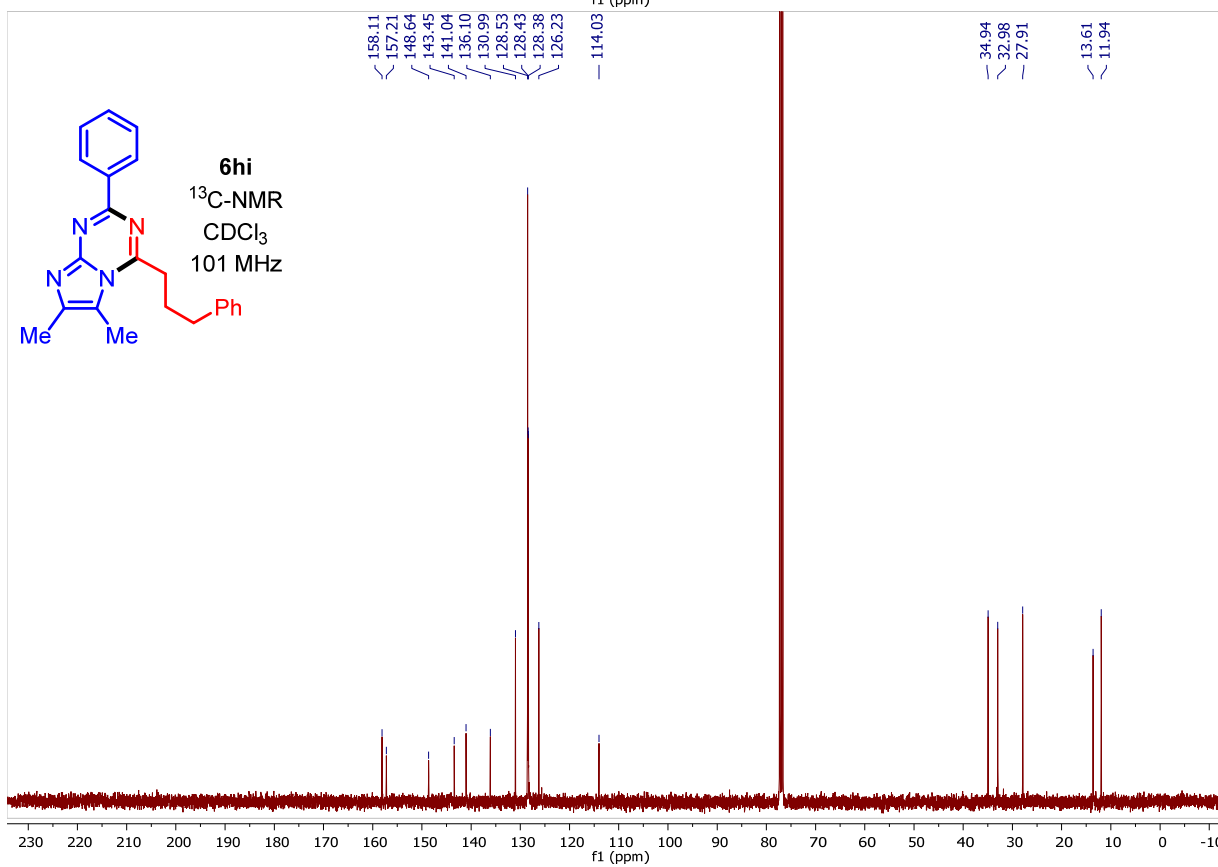

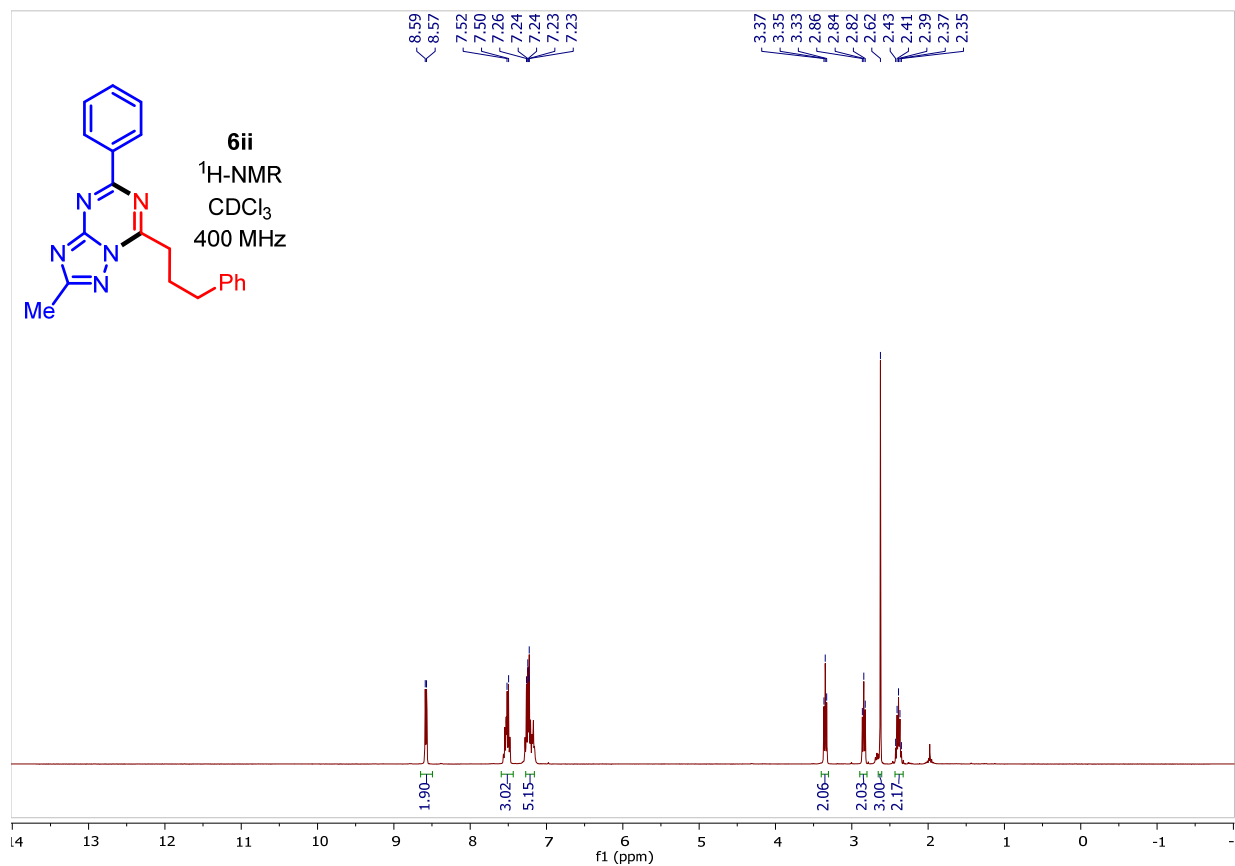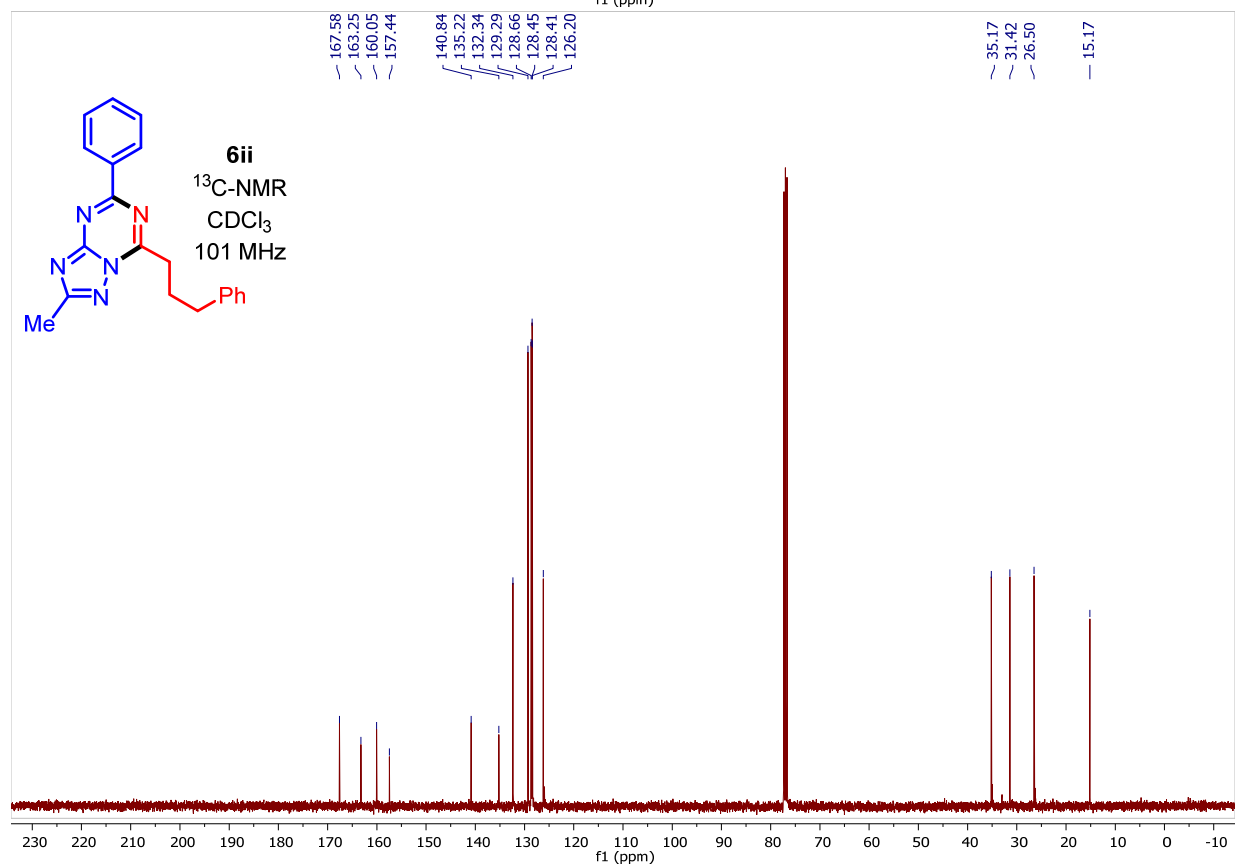

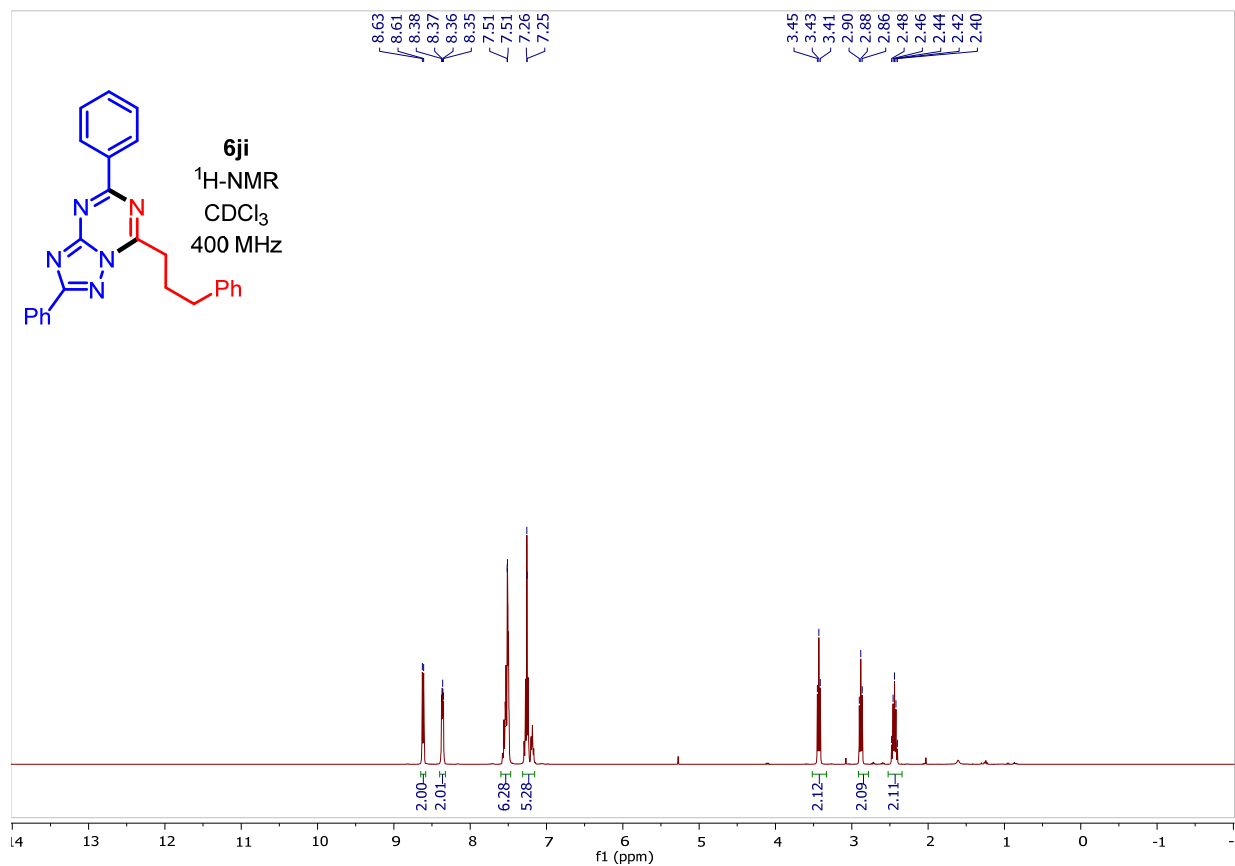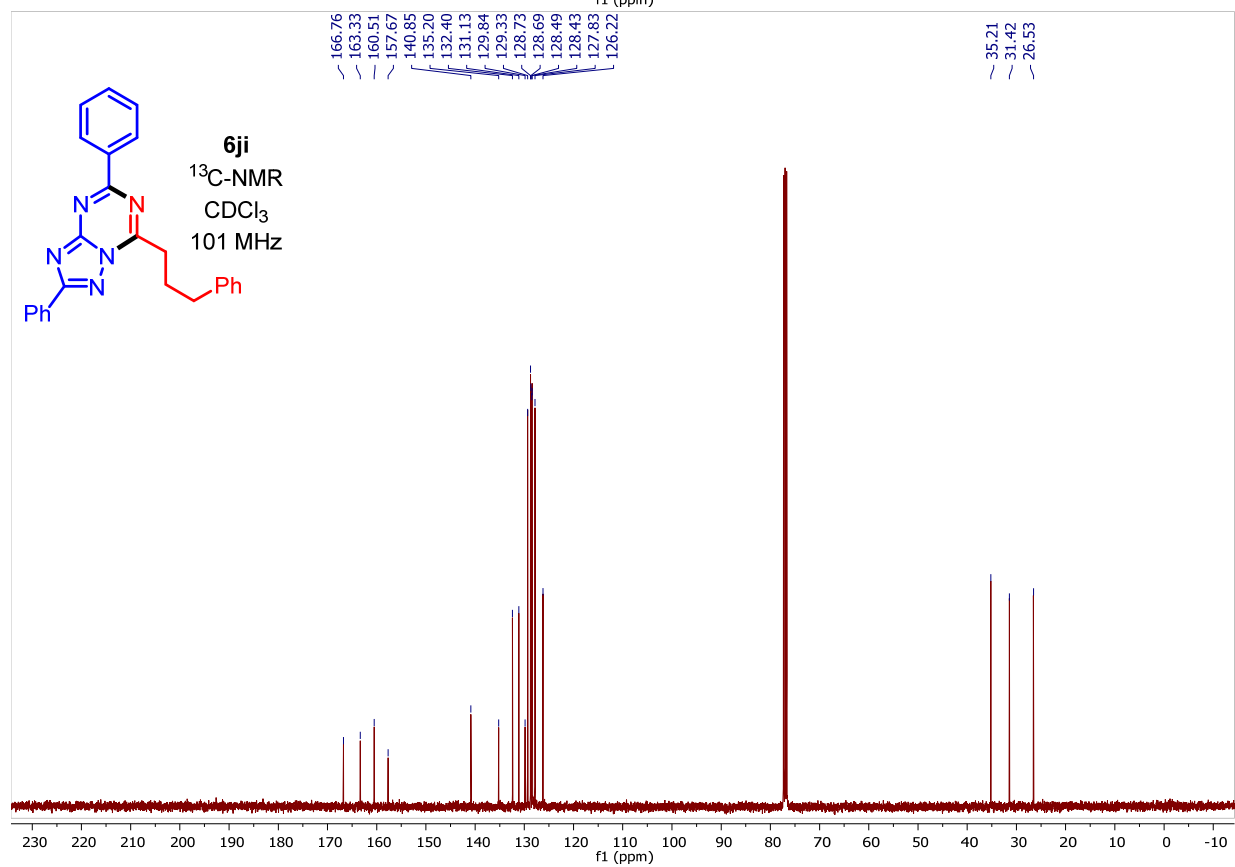

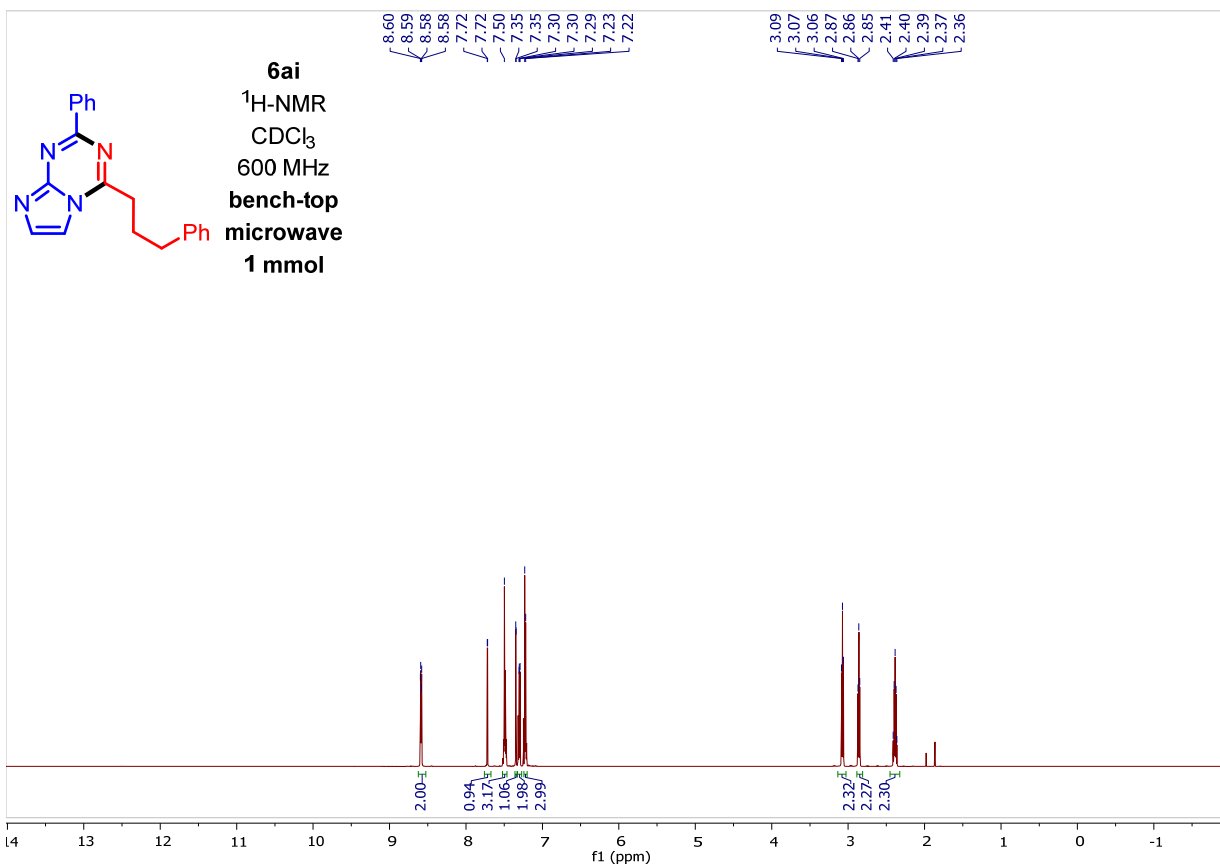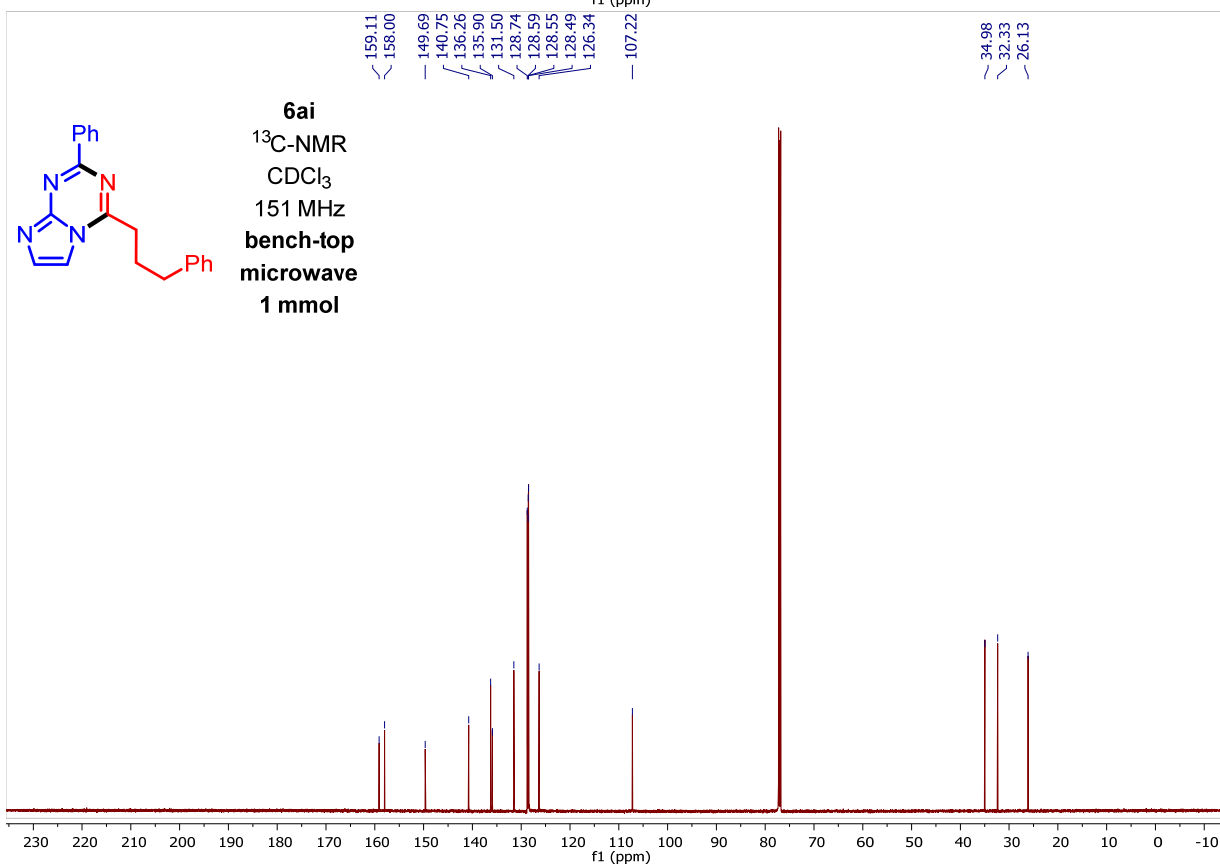

Supplement: NIHMS979964-supplement-Supplemental_Information.pdf [file NIHMS979964-supplement-Supplemental_Information.pdf]
